# Supplementary material for: Dehydrogenation of diborane on small Nbn+ clusters
Source: Royal Society of Chemistry journal article supplement (doi:10.1039/d3cp06135c), 2024-01-01
Supplement: d3cp06135c1.pdf [file d3cp06135c1.pdf]

*Supporting Information for*

**Dehydrogenation of Diborane on Small Nb<sub>n</sub><sup>+</sup> Clusters**

*Wen Gan,<sup>a</sup> Lijun Geng,<sup>a</sup> Benben Huang,<sup>a</sup> Klavs Hansen,<sup>b</sup> and Zhixun Luo<sup>a,b,\*</sup>*

<sup>a</sup> Beijing National Laboratory for Molecular Science, State Key Laboratory for Structural Chemistry of Unstable and Stable Species, Institute of Chemistry, Chinese Academy of Sciences, Beijing, 100190, China;

<sup>b</sup> Center for Joint Quantum Studies and Department of Physics, School of Science, Tianjin University, 92 Weijin Road, Tianjin 300072, China;

<sup>c</sup> School of Chemical Science, University of Chinese Academy of Sciences, Beijing 100049, China.

\*Corresponding author. E-mail: zxlue@iccas.ac.cn (Z.L).

## S1 Mass Spectrometry Experiments

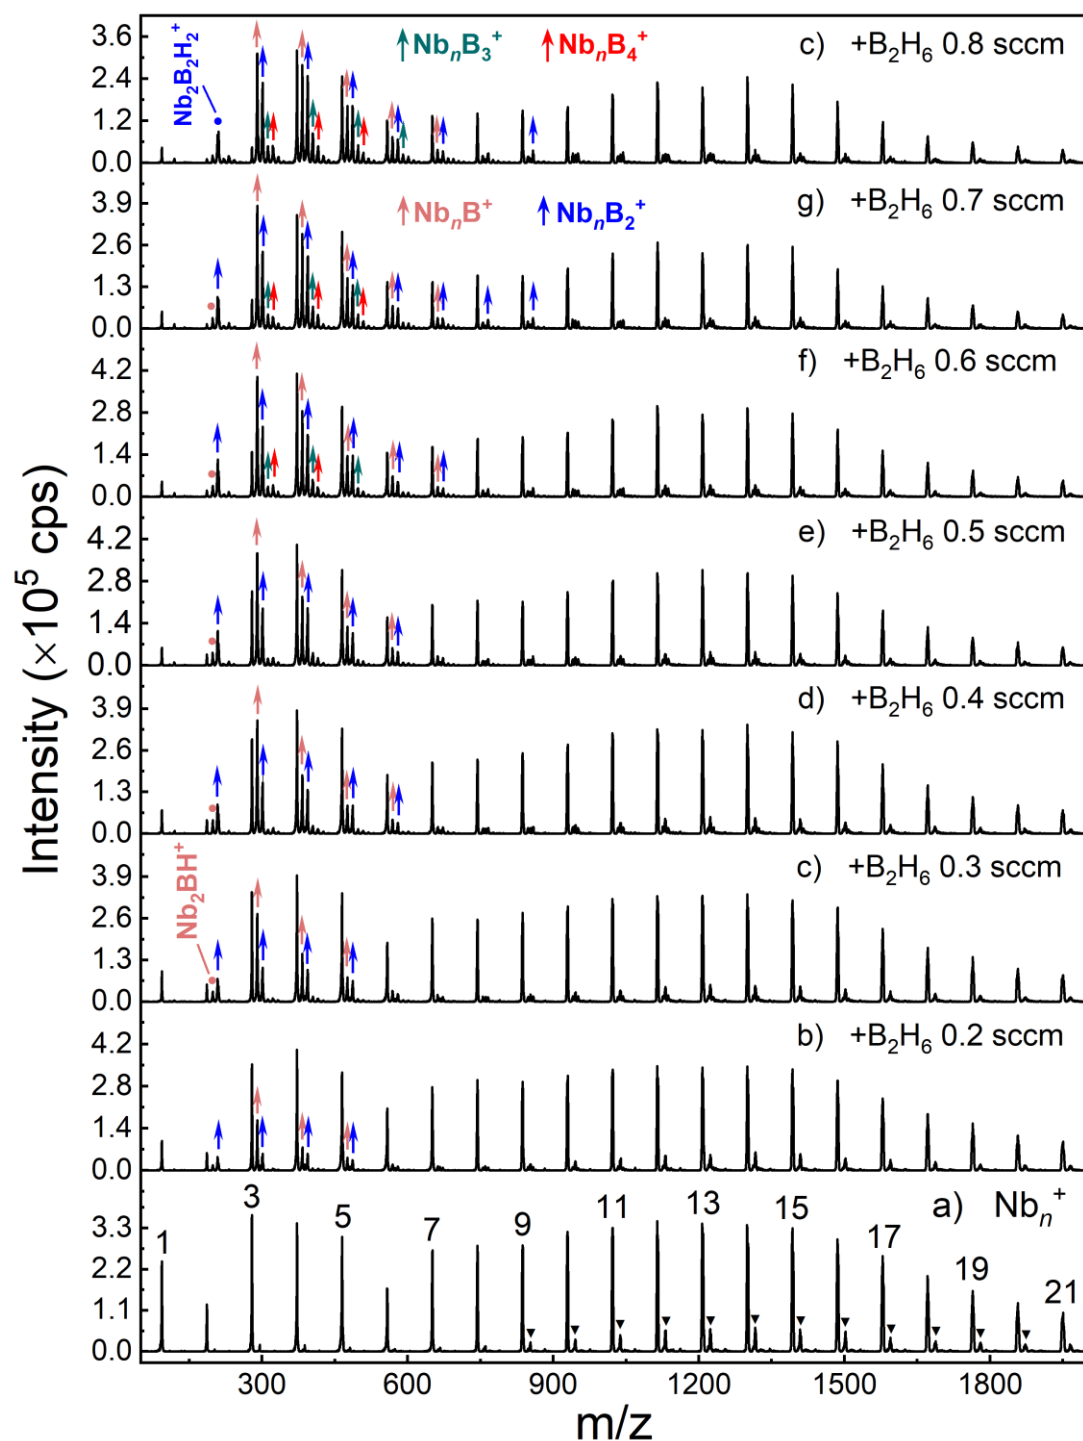

**Figure S1. Reactant concentration dependence.** Mass spectra of pure  $\text{Nb}_n^+$  clusters (a) and after reacting with  $\text{B}_2\text{H}_6$  (b-g) in the laminar flow tube at different gas concentrations corresponding to different flow rates of the reactant gas (0.3%  $\text{B}_2\text{H}_6$  in He). The weak peaks in the nascent  $\text{Nb}_n^+$  cluster, marked with triangles, are due to minor niobium oxide contamination.

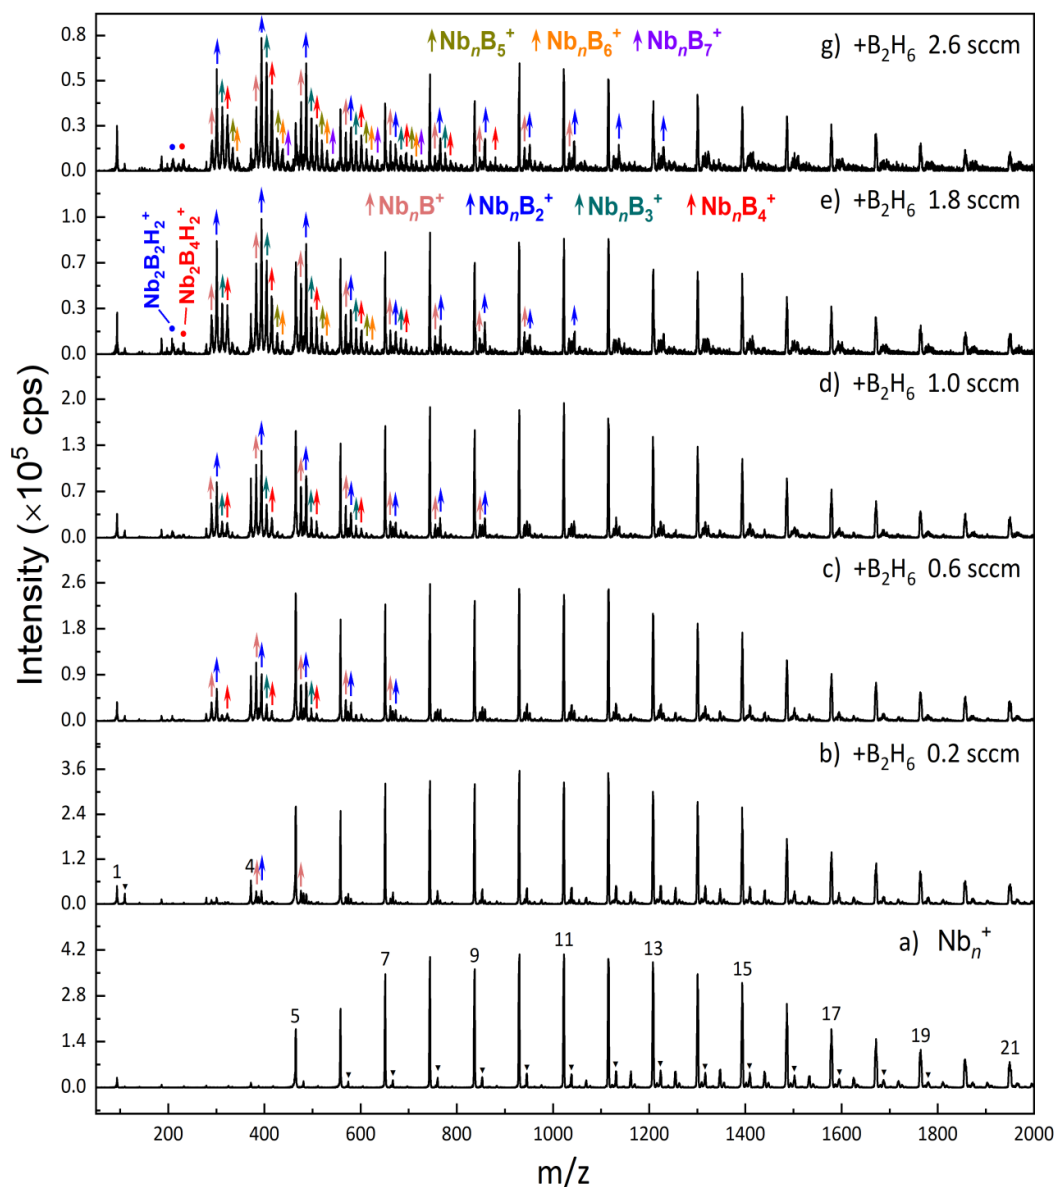

**Figure S2. Concentration-dependent reactions of  $\text{Nb}_n^+$  at a different distribution.** Mass spectra of the  $\text{Nb}_n^+$  clusters (a) and after reacting with  $\text{B}_2\text{H}_6$  (b-g) in the laminar flow tube at different gas concentrations corresponding to different flow rates of the reactant gas (0.3%  $\text{B}_2\text{H}_6$  in He). The weak peaks in the nascent  $\text{Nb}_n^+$  cluster, marked with triangles, are due to minor niobium oxide contamination.

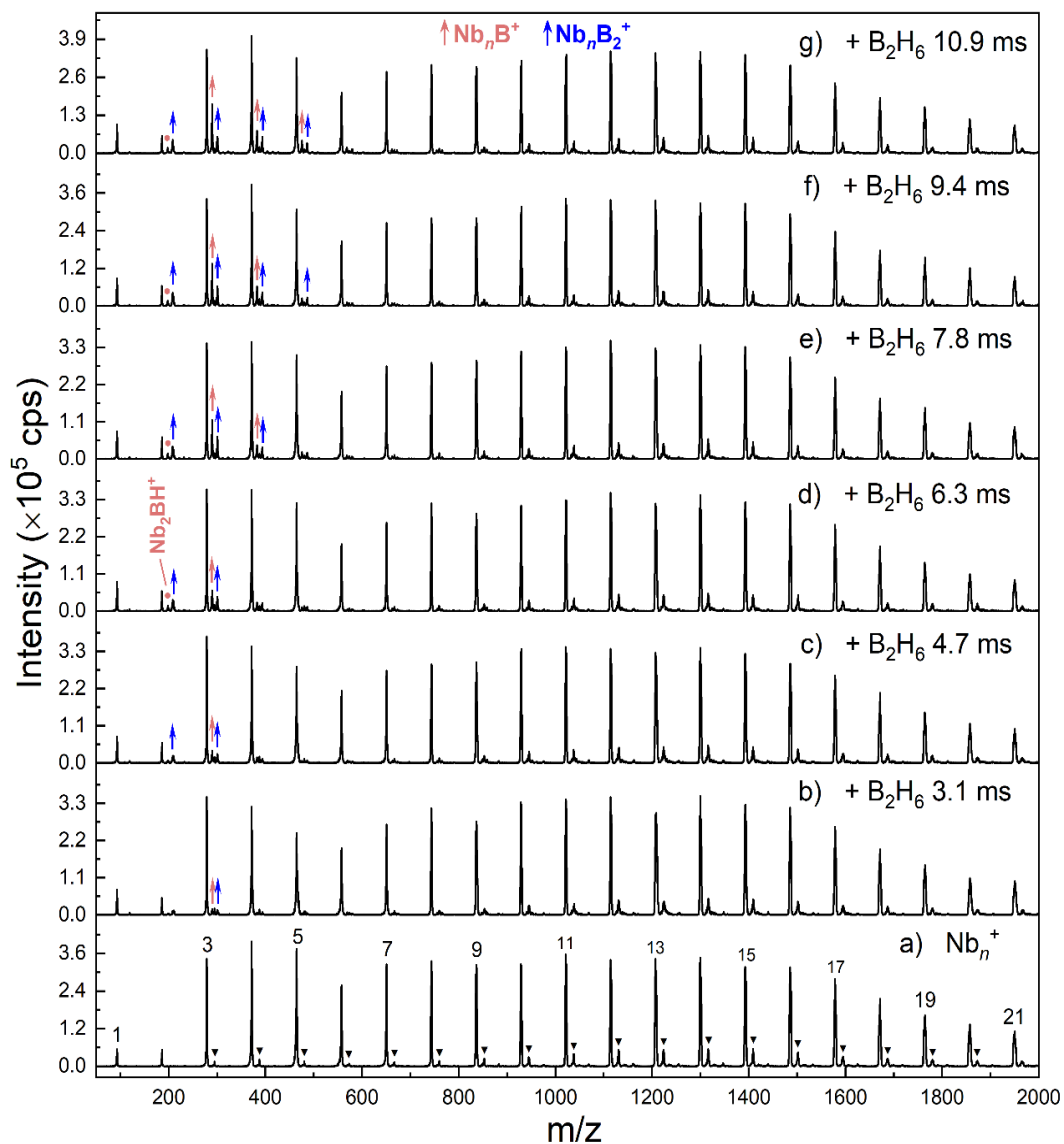

**Figure S3. Reaction time dependence of 0.2 sccm  $B_2H_6$ .** Mass spectra of the nascent  $Nb_n^+$  clusters (a), and after reacting with 0.2 sccm  $B_2H_6$  (0.3% in He) in the laminar flow tube with controlled reaction time corresponding to 3.1, 4.7, 6.3, 7.8, 9.4, and 10.9 ms respectively (b-g). The weak peaks in the nascent  $Nb_n^+$  cluster, marked with triangles, are due to minor niobium oxide contamination.

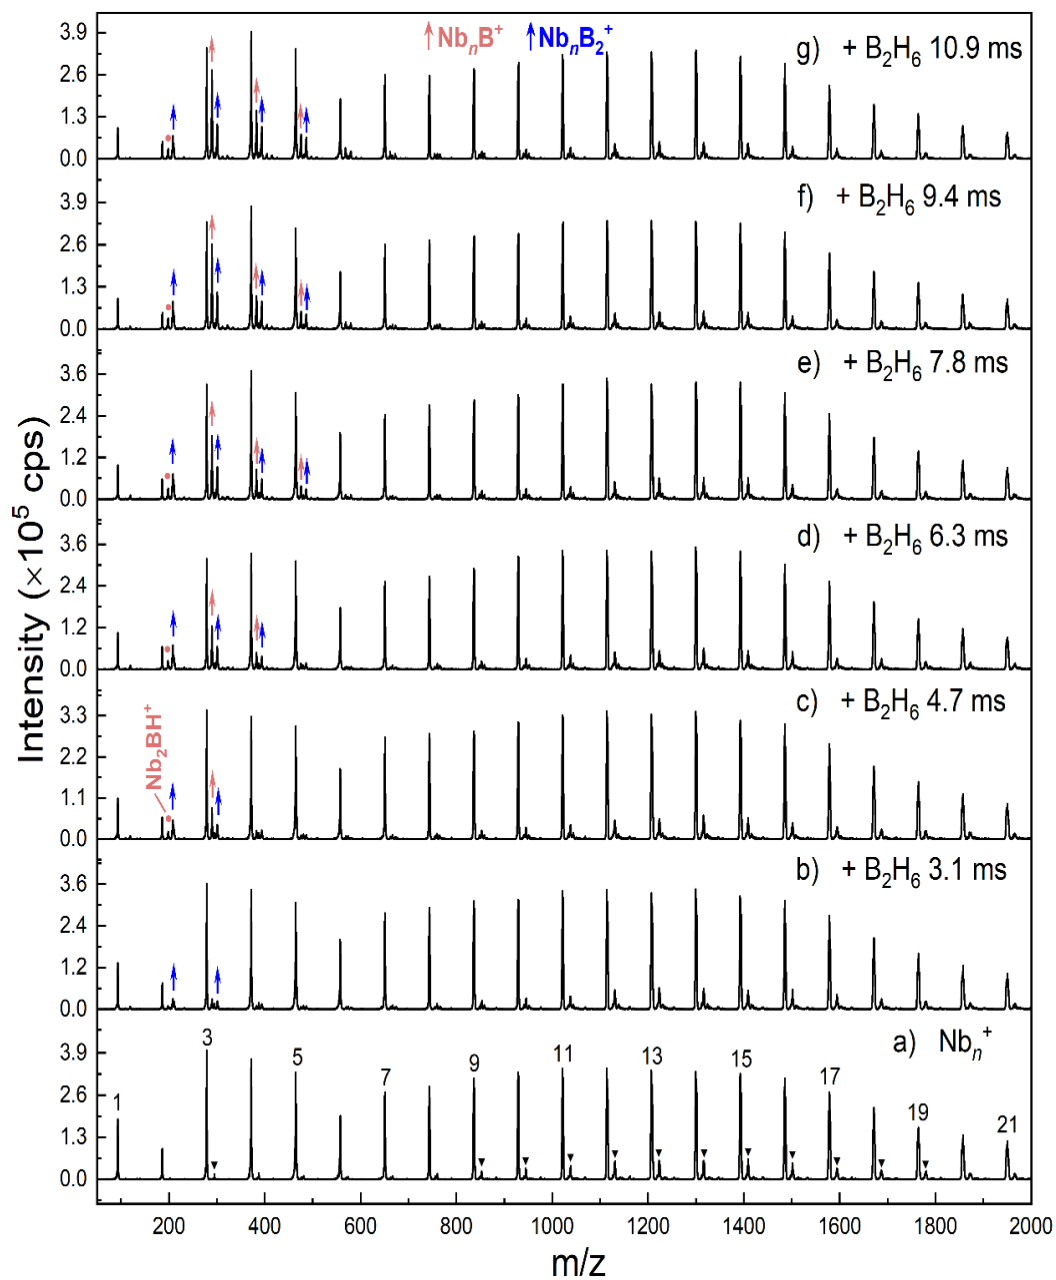

**Figure S4. Reaction time dependence of 0.3 sccm B<sub>2</sub>H<sub>6</sub>.** Mass spectra of the nascent Nb<sub>*n*</sub><sup>+</sup> clusters (a), and after reacting with 0.3 sccm B<sub>2</sub>H<sub>6</sub> (0.3% in He) in the laminar flow tube with controlled reaction time corresponding to 3.1, 4.7, 6.3, 7.8, 9.4, and 10.9 ms respectively (b-g). The weak peaks in the nascent Nb<sub>*n*</sub><sup>+</sup> cluster, marked with triangles, are due to trace amount of niobium oxide contamination.

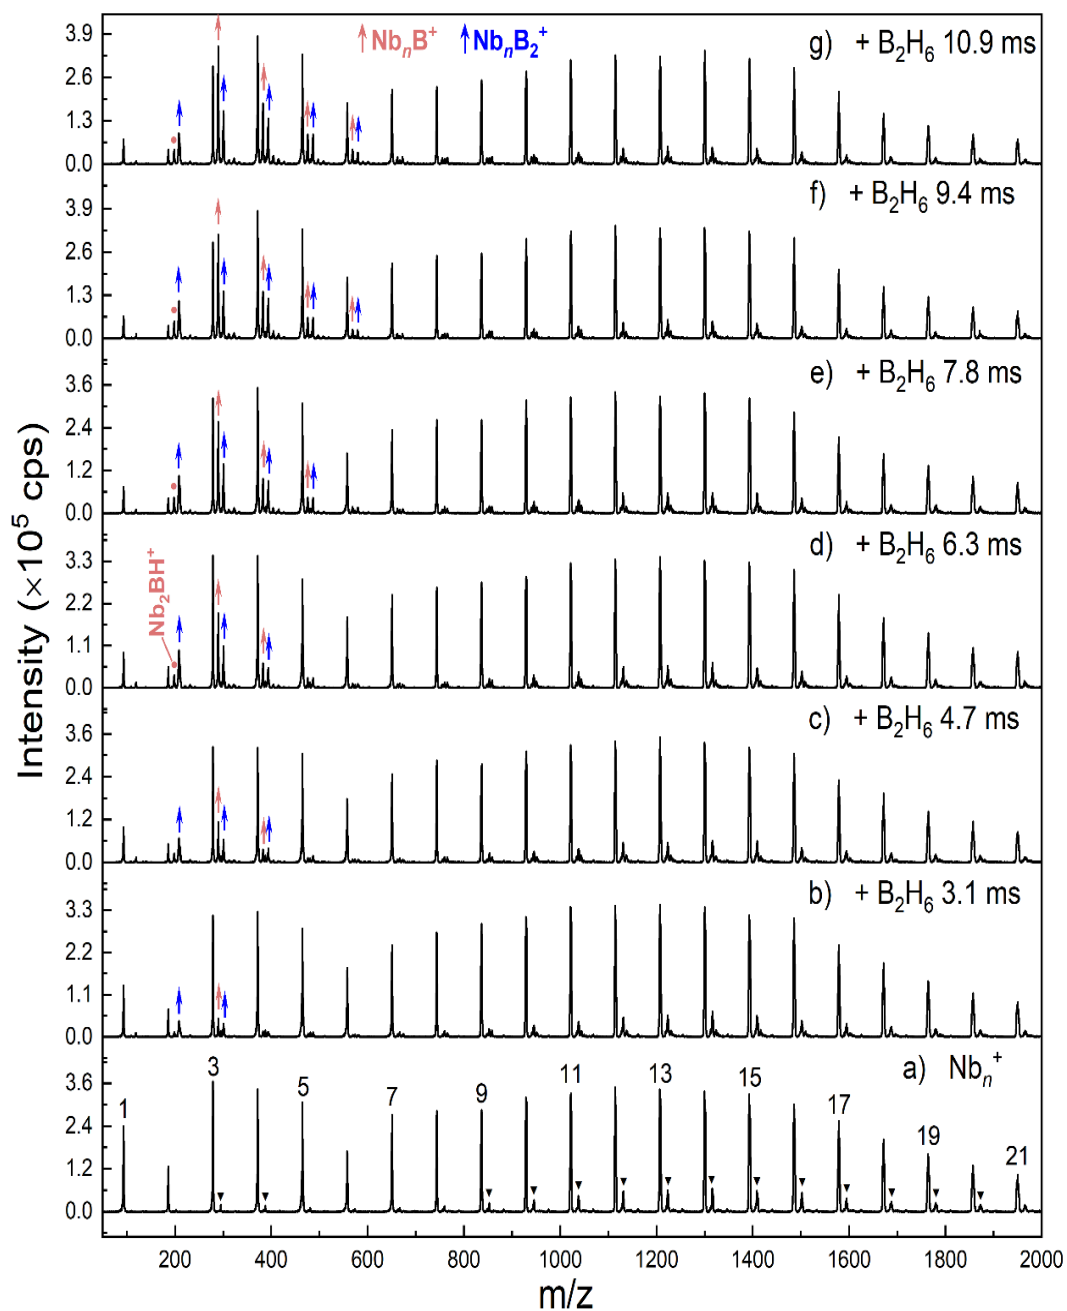

**Figure S5. Reaction time dependence of 0.4 sccm B<sub>2</sub>H<sub>6</sub>.** Mass spectra of the nascent Nb<sub>*n*</sub><sup>+</sup> clusters (a), and after reacting with 0.4 sccm B<sub>2</sub>H<sub>6</sub> (0.3% in He) in the laminar flow tube with controlled reaction time corresponding to 3.1, 4.7, 6.3, 7.8, 9.4, and 10.9 ms respectively (b-g). The weak peaks in the nascent Nb<sub>*n*</sub><sup>+</sup> cluster, marked with triangles, are due to minor niobium oxide contamination.

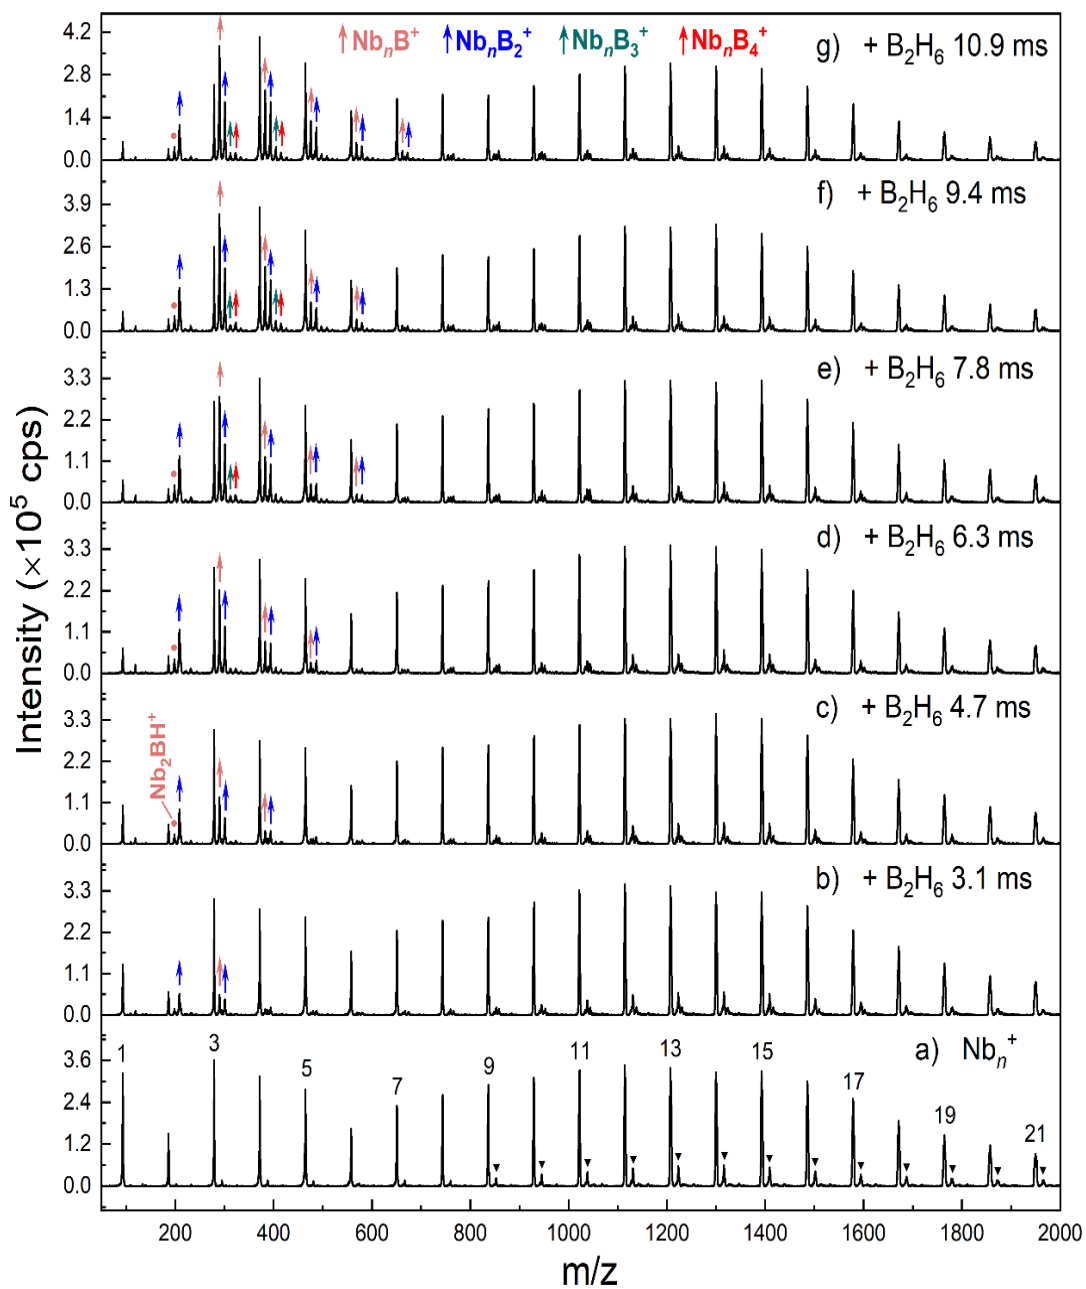

**Figure S6. Reaction time dependence of 0.5 sccm  $B_2H_6$ .** Mass spectra of the nascent  $Nb_n^+$  clusters (a), and after reacting with 0.5 sccm  $B_2H_6$  (0.3% in He) in the laminar flow tube with controlled reaction time corresponding to 3.1, 4.7, 6.3, 7.8, 9.4, and 10.9 ms respectively (b-g). The weak peaks in the nascent  $Nb_n^+$  cluster, marked with triangles, are due to minor niobium oxide contamination.

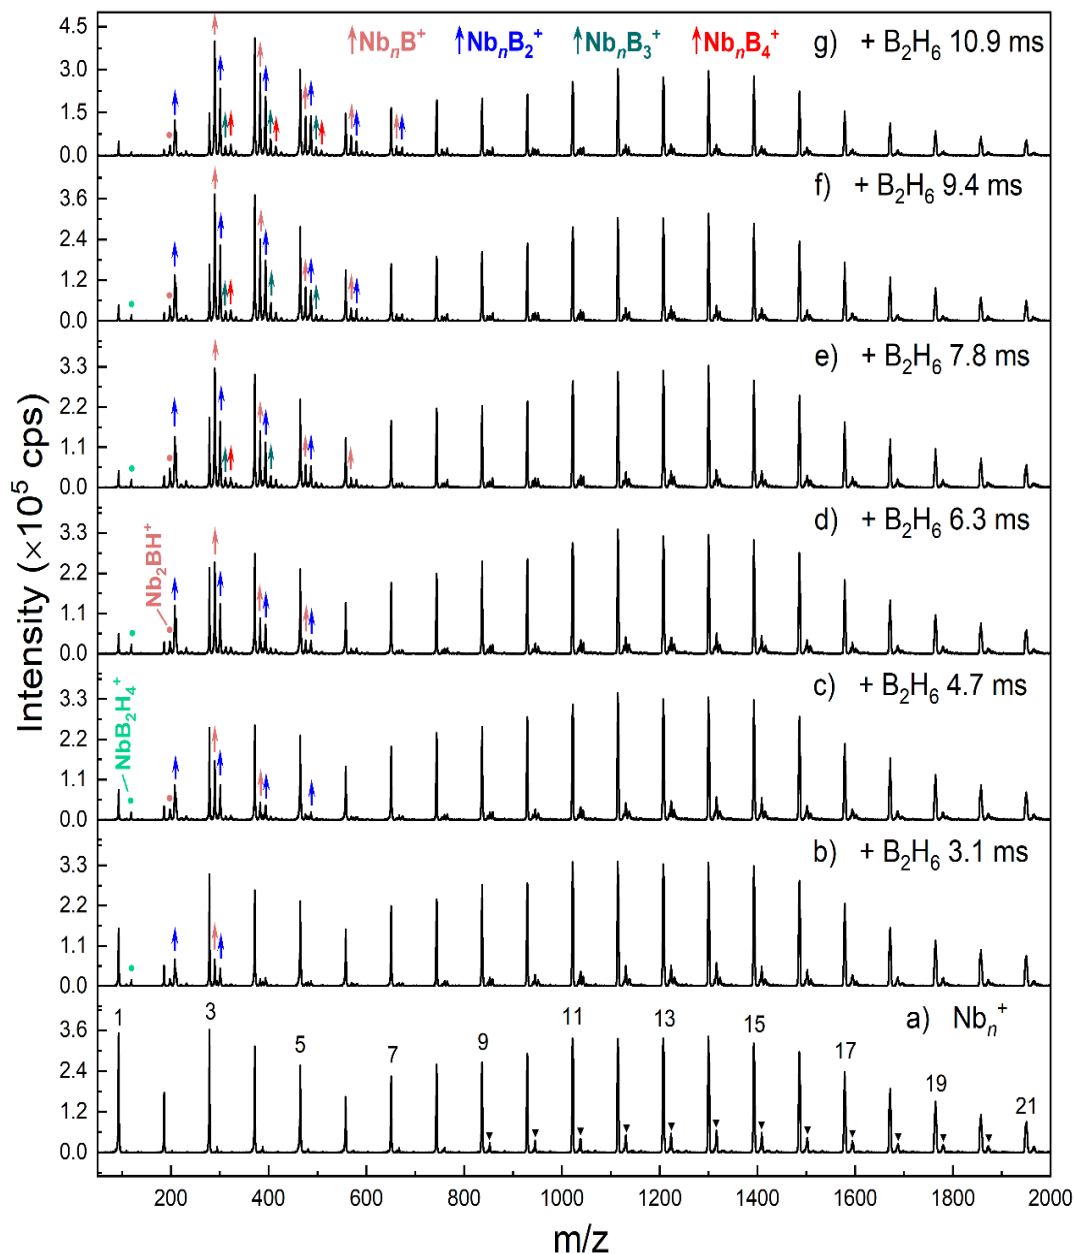

**Figure S7. Reaction time dependence of 0.6 sccm B<sub>2</sub>H<sub>6</sub>.** Mass spectra of the nascent Nb<sub>*n*</sub><sup>+</sup> clusters (**a**), and after reacting with 0.6 sccm B<sub>2</sub>H<sub>6</sub> (0.3% in He) in the laminar flow tube with controlled reaction time corresponding to 3.1, 4.7, 6.3, 7.8, 9.4, and 10.9 ms respectively (**b-g**). The weak peaks in the nascent Nb<sub>*n*</sub><sup>+</sup> cluster, marked with triangles, are due to minor niobium oxide contamination.



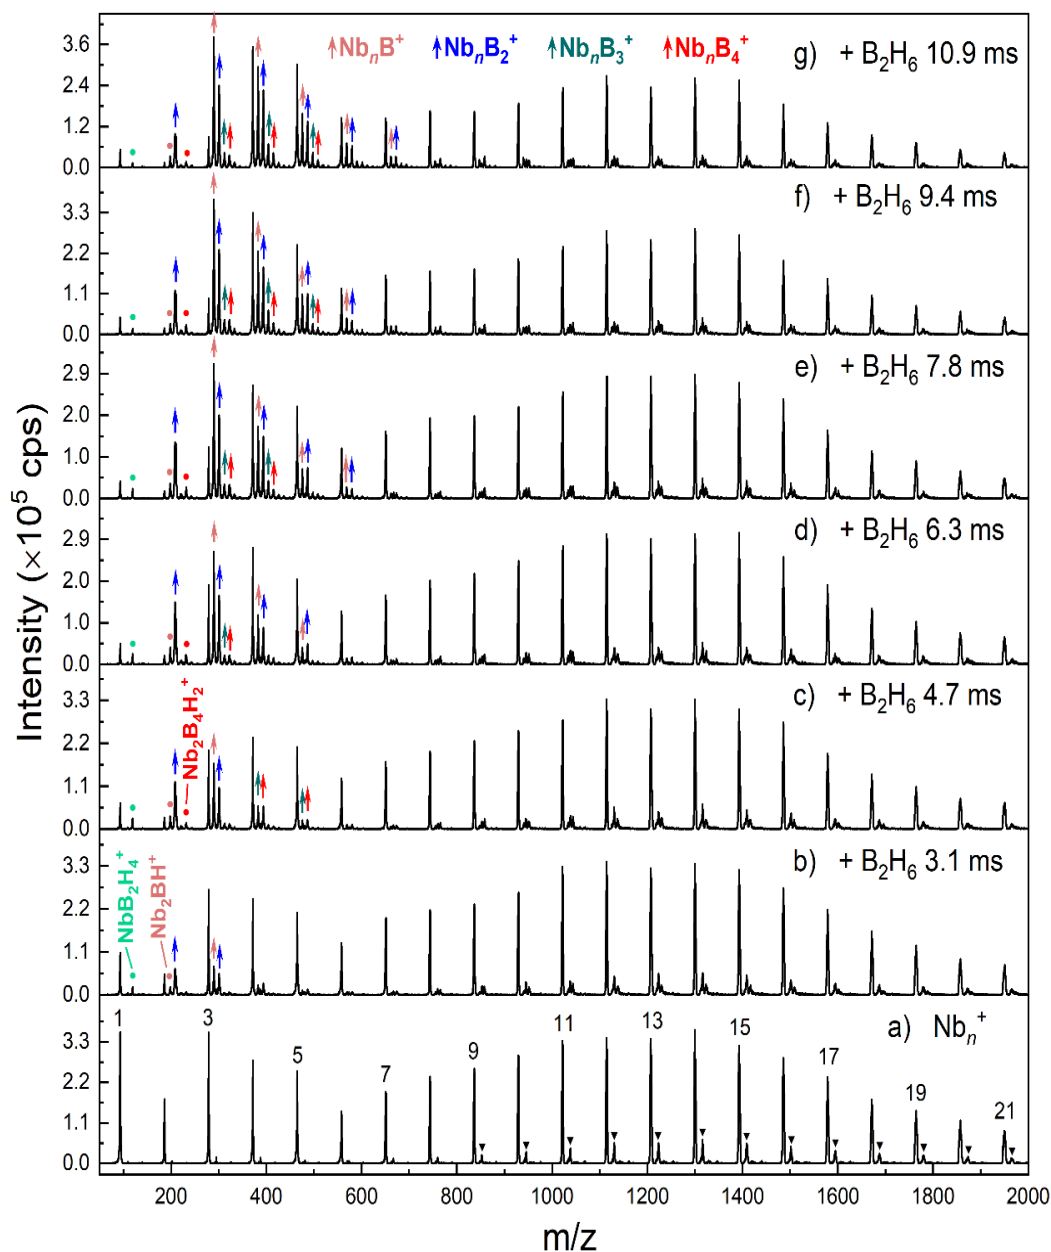

**Figure S8. Reaction time dependence of 0.7 sccm  $B_2H_6$ .** Mass spectra of the nascent  $Nb_n^+$  clusters (a), and after reacting with 0.7 sccm  $B_2H_6$  (0.3% in He) in the laminar flow tube with controlled reaction time corresponding to 3.1, 4.7, 6.3, 7.8, 9.4, and 10.9 ms respectively (b-g). The weak peaks in the nascent  $Nb_n^+$  cluster, marked with triangles, are due to minor niobium oxide contamination.

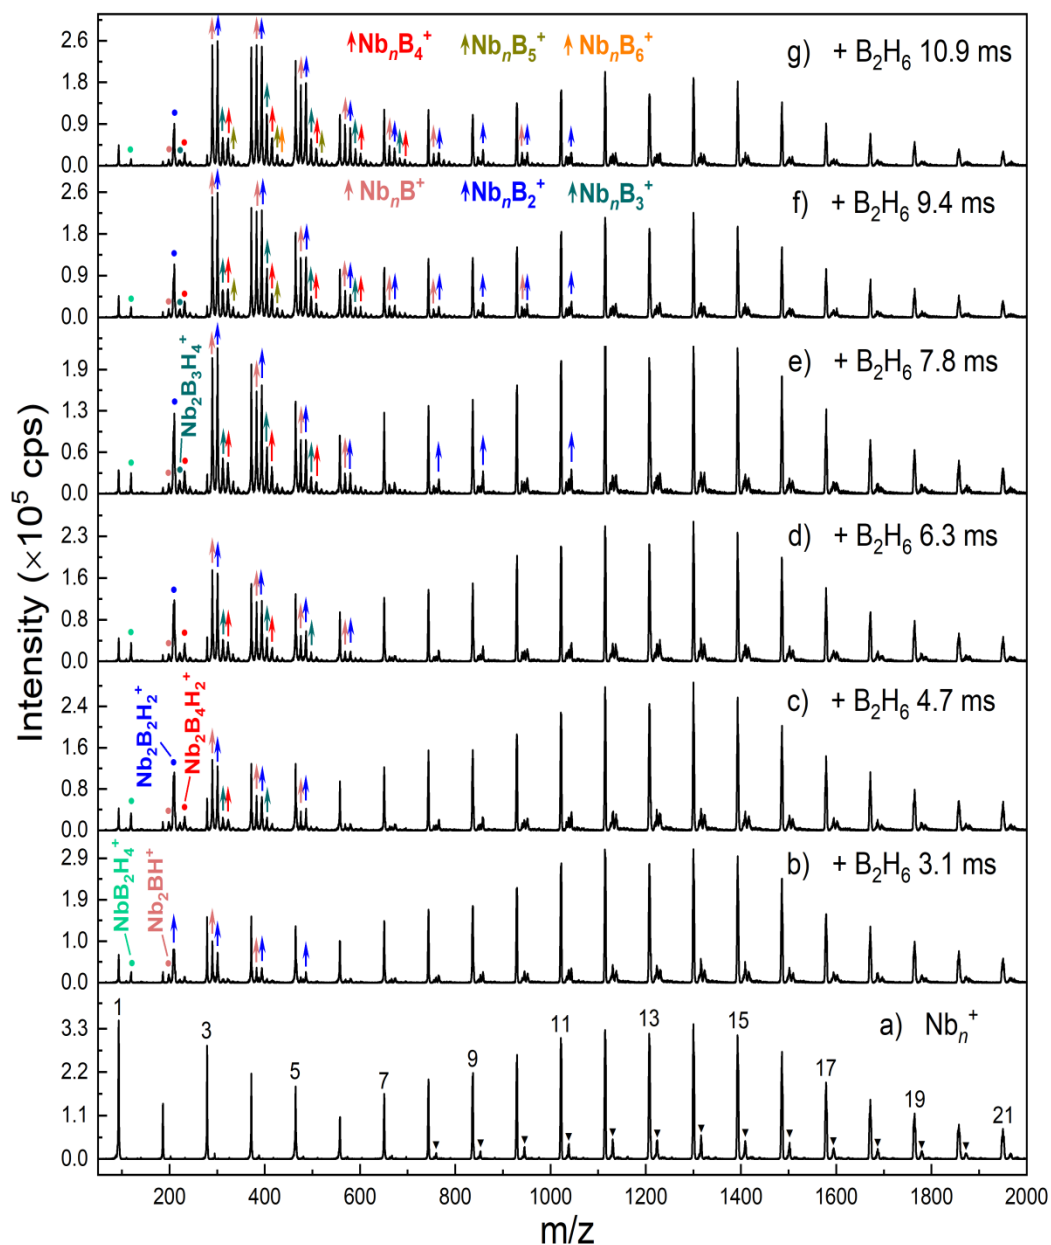

**Figure S9. Reaction time dependence of 1.0 sccm  $\text{B}_2\text{H}_6$ .** Mass spectra of the nascent  $\text{Nb}_n^+$  clusters (a), and after reacting with 1.0 sccm  $\text{B}_2\text{H}_6$  (0.3% in He) in the laminar flow tube with controlled reaction time corresponding to 3.1, 4.7, 6.3, 7.8, 9.4, and 10.9 ms respectively (b-g). The weak peaks in the nascent  $\text{Nb}_n^+$  cluster, marked with triangles, are due to minor niobium oxide contamination.

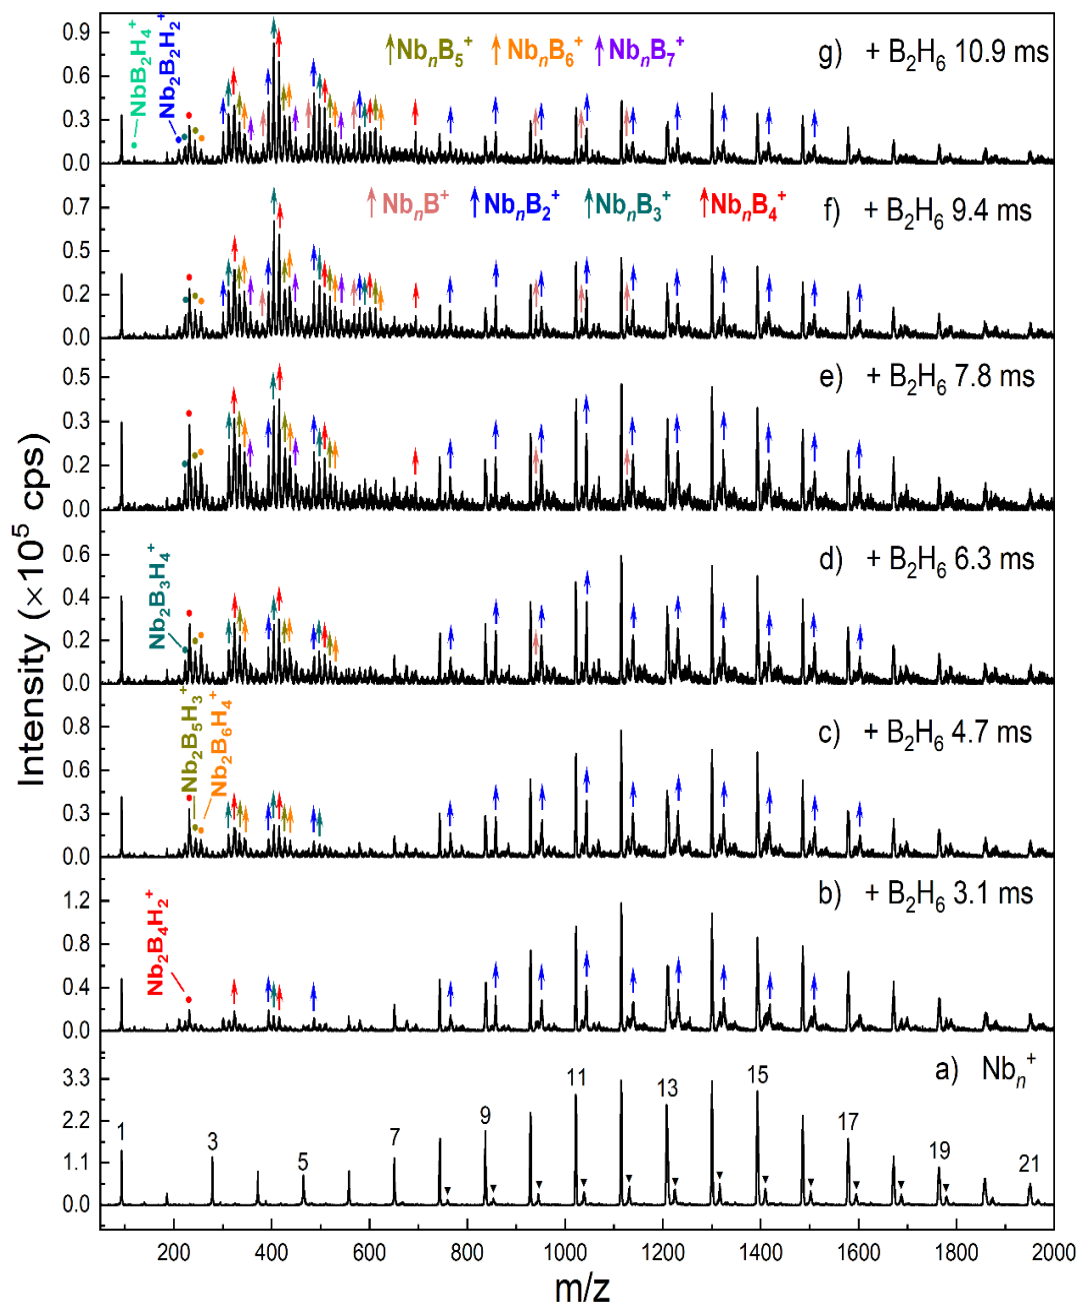

**Figure S10. Reaction time dependence of 3.0 sccm  $B_2H_6$ .** Mass spectra of the nascent  $Nb_n^+$  clusters (a), and after reacting with 3.0 sccm  $B_2H_6$  (0.3% in He) in the laminar flow tube with controlled reaction time corresponding to 3.1, 4.7, 6.3, 7.8, 9.4, and 10.9 ms respectively (b-g). The weak peaks in the nascent  $Nb_n^+$  cluster, marked with triangles, are due to minor niobium oxide contamination.

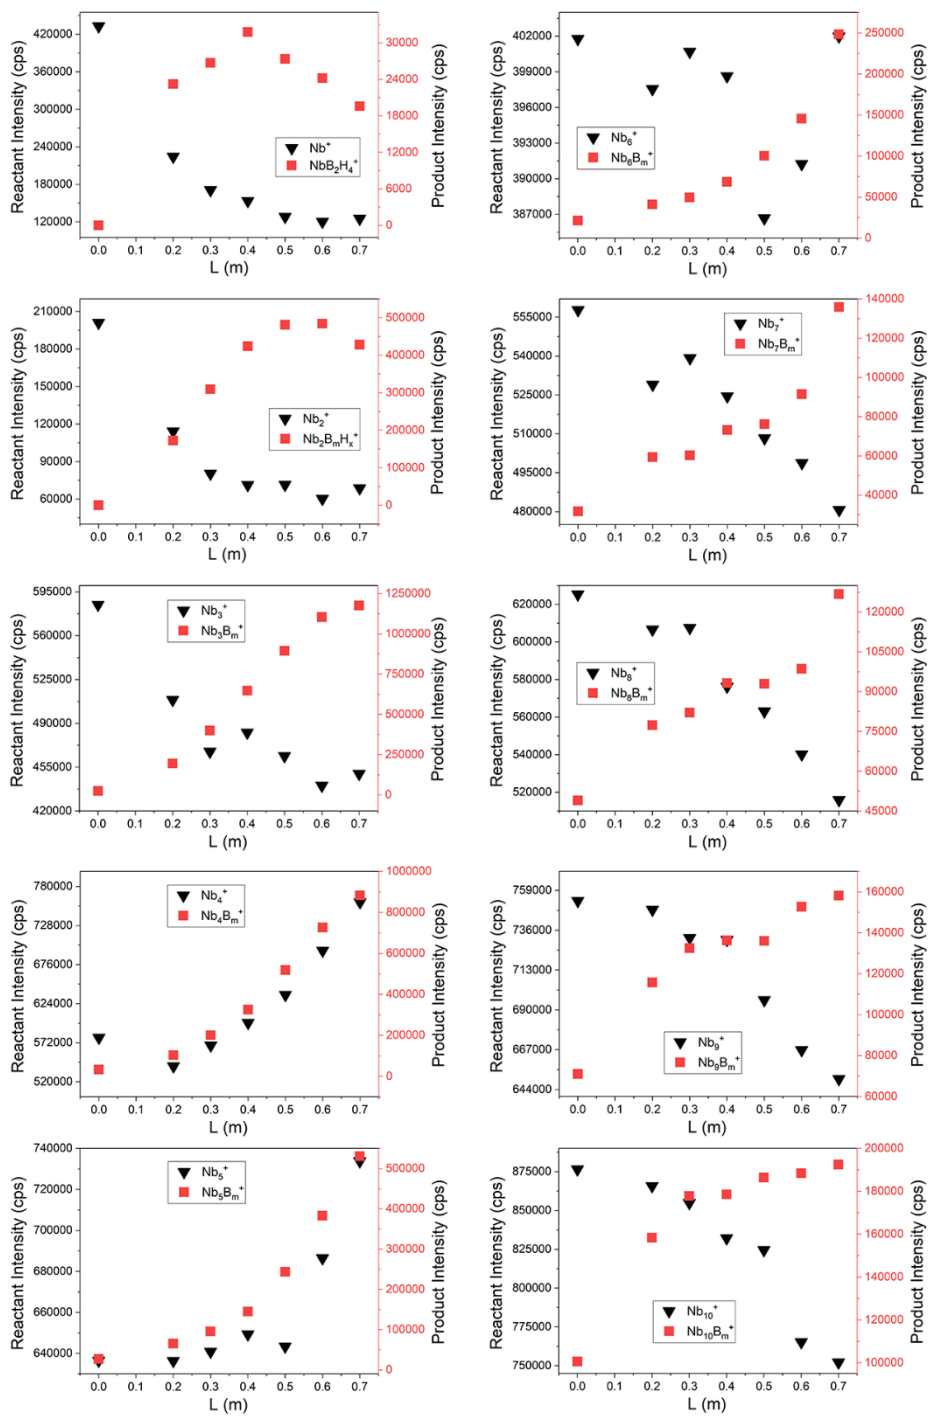

**Figure S11.** Absolute intensity of the  $\text{Nb}_n^+$  ( $n = 1-10$ ) clusters and their reaction products with  $0.4 \text{ sccm B}_2\text{H}_6$  (0.3% in He) at different reaction time determined by the inlet distance.

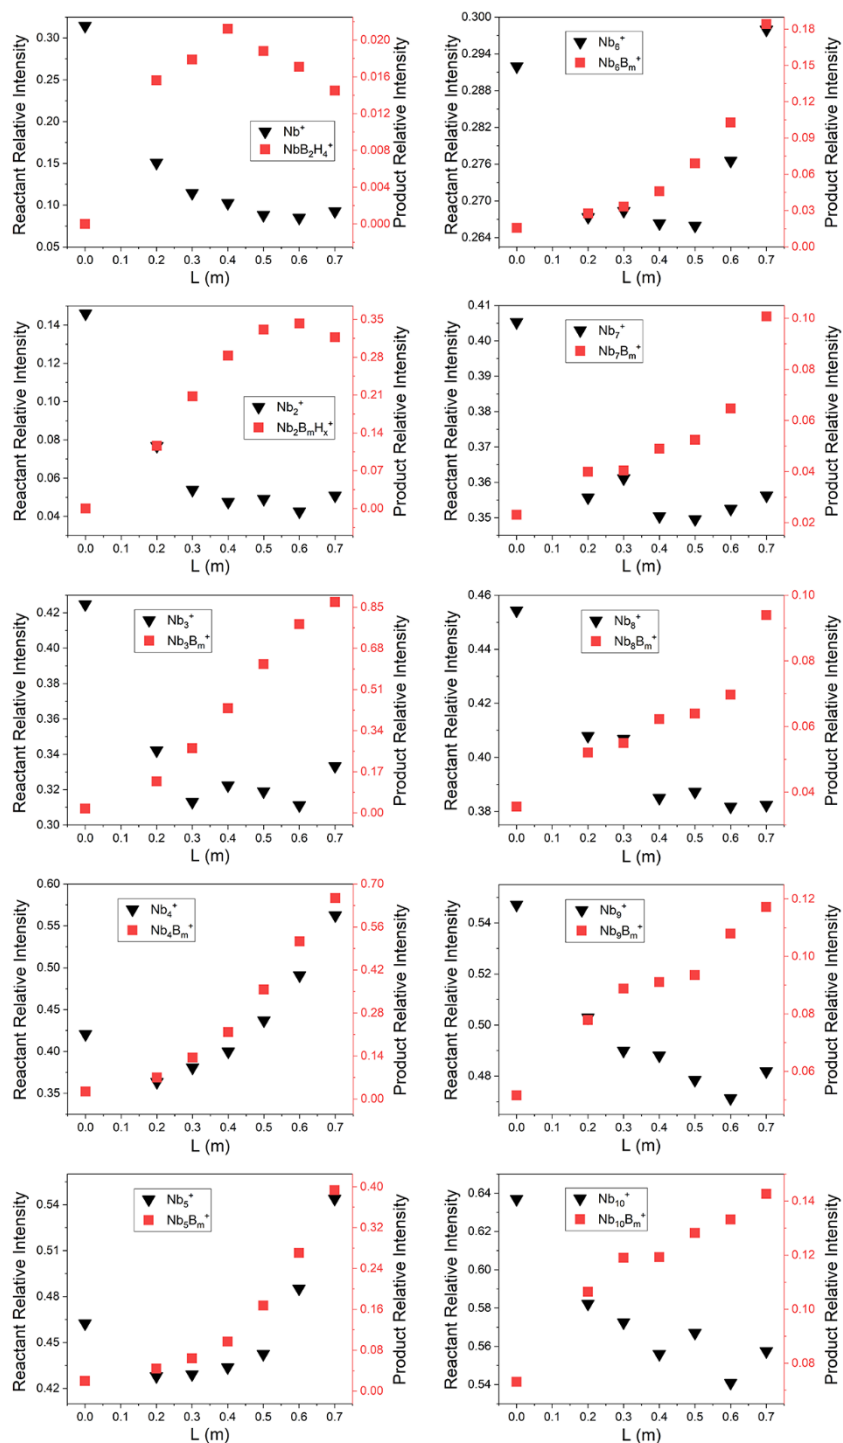

**Figure S12.** Relative intensity  $I(\text{Nb}_n^+)/I(\text{Nb}_{13}^+)$  of the  $\text{Nb}_n^+$  ( $n = 1-10$ ) clusters and the products after reacting with  $0.4 \text{ sccm B}_2\text{H}_6$  (0.3% in He) at different reaction time determined by the inlet distance.

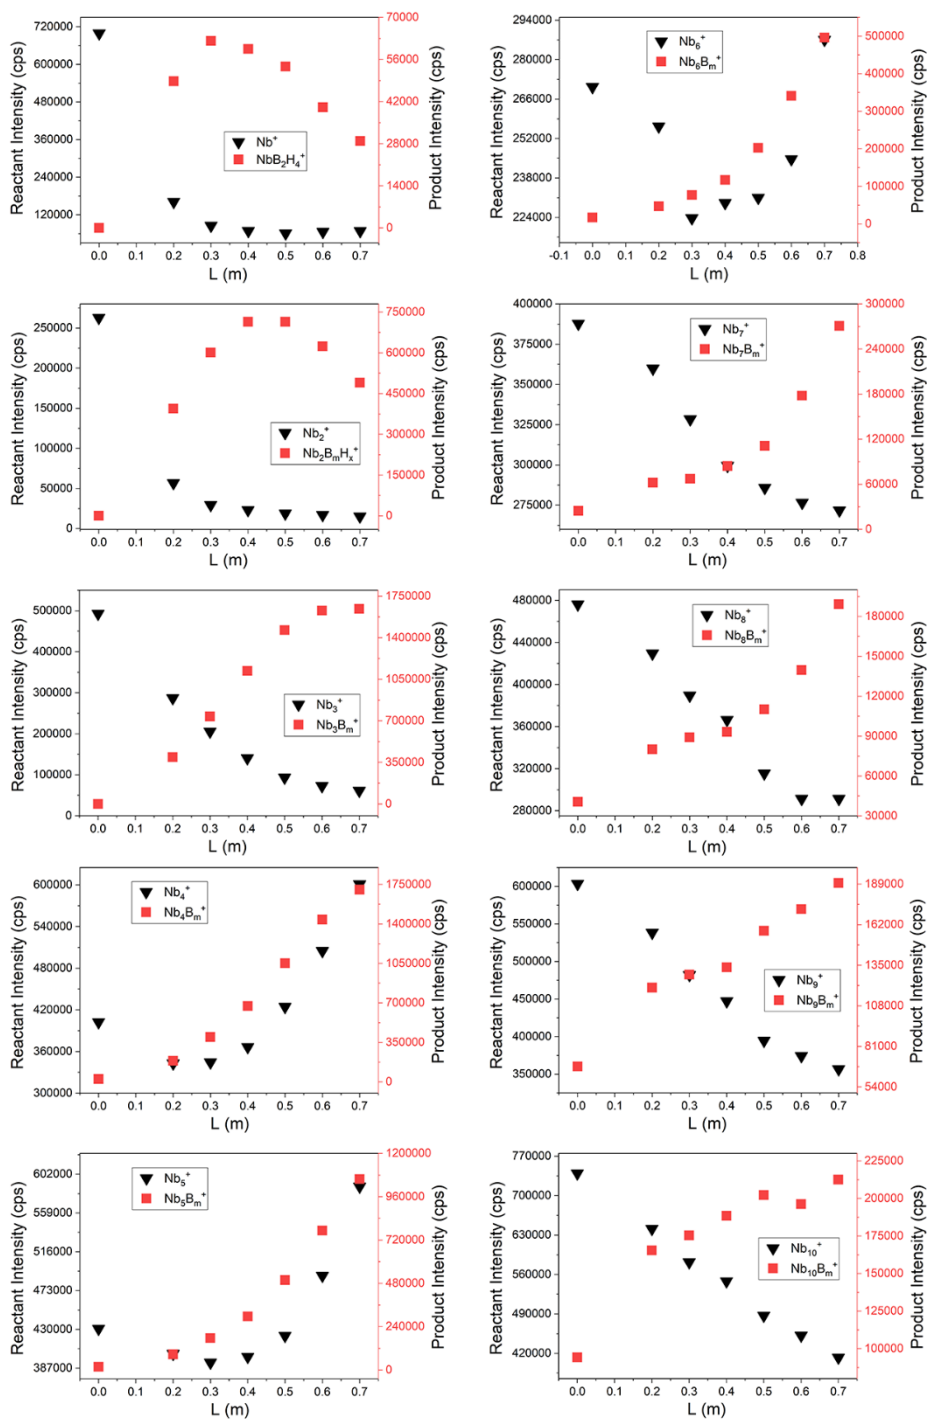

**Figure S13.** Absolute intensity of the Nb<sub>n</sub><sup>+</sup> (*n* = 1-10) clusters and the products after reacting with **0.8 sccm** B<sub>2</sub>H<sub>6</sub> (0.3% in He) at different reaction time determined by the inlet distance.

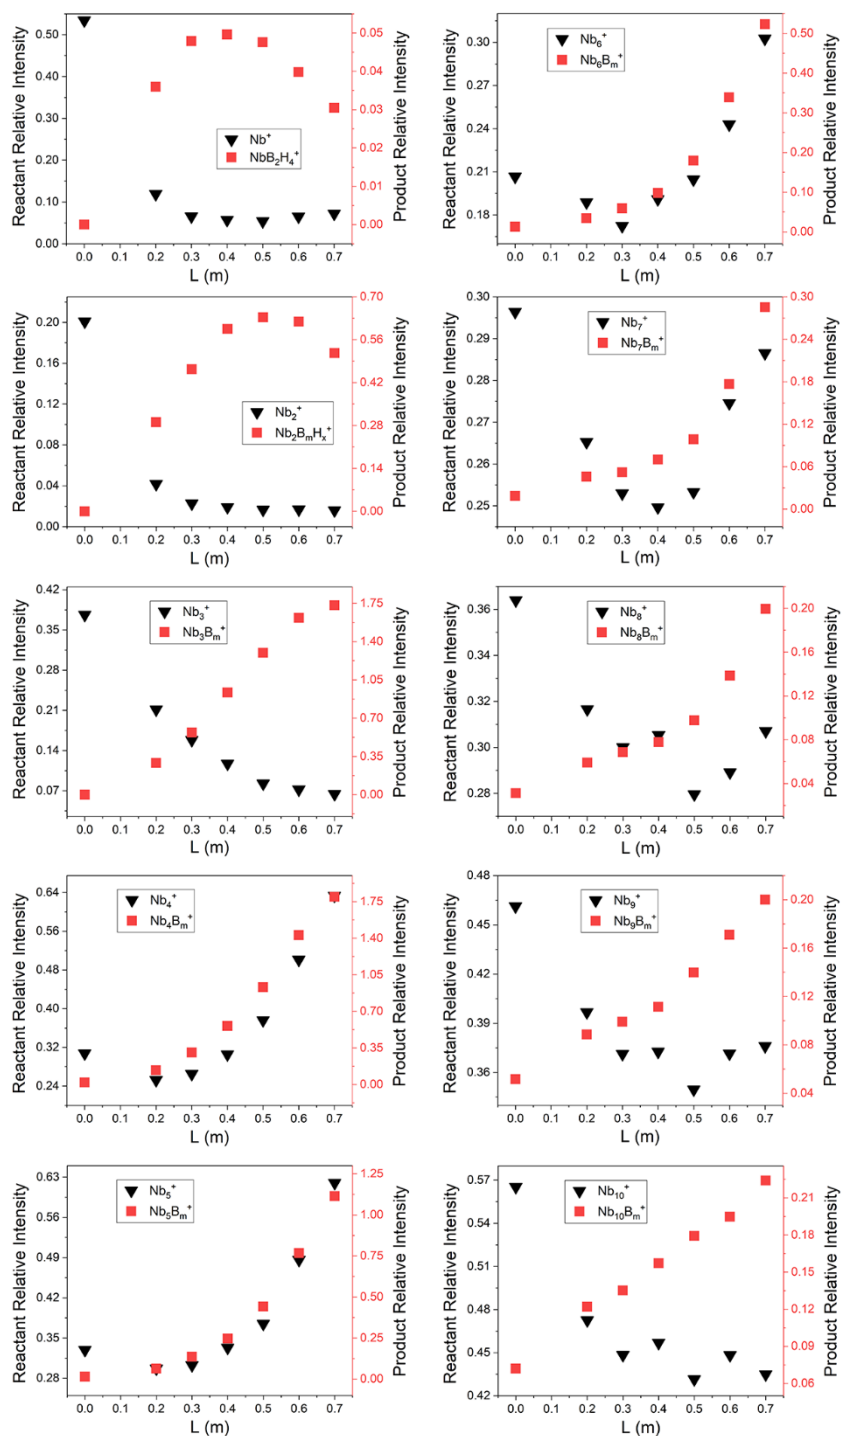

**Figure S14.** Relative intensity  $I(\text{Nb}_n^+)/I(\text{Nb}_{13}^+)$  of the  $\text{Nb}_n^+$  ( $n = 1-10$ ) clusters and the products after reacting with **0.8 sccm**  $\text{B}_2\text{H}_6$  (0.3% in He) at different reaction time determined by the inlet distance.

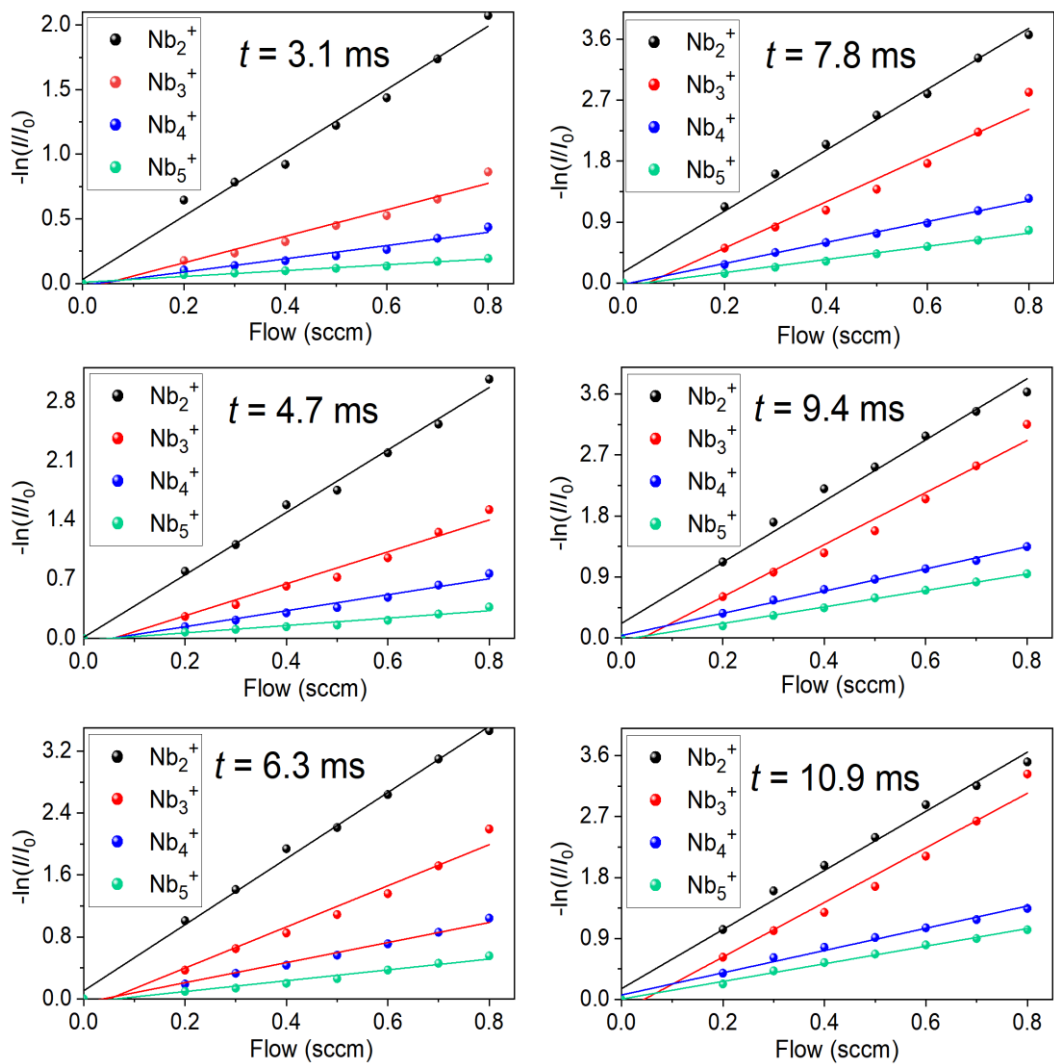

**Figure S15. Linear fitting of  $-\ln(I/I_0)$  of  $\text{Nb}_n^+$  ( $n=2-5$ ) vs. the flow (0-0.8 sccm) of the  $\text{B}_2\text{H}_6$  reactant (0.3% in He), under the varied conditions of different reaction time ( $t = 3.1, 4.7, 6.3, 7.8, 9.4, 10.9$  ms, respectively).**



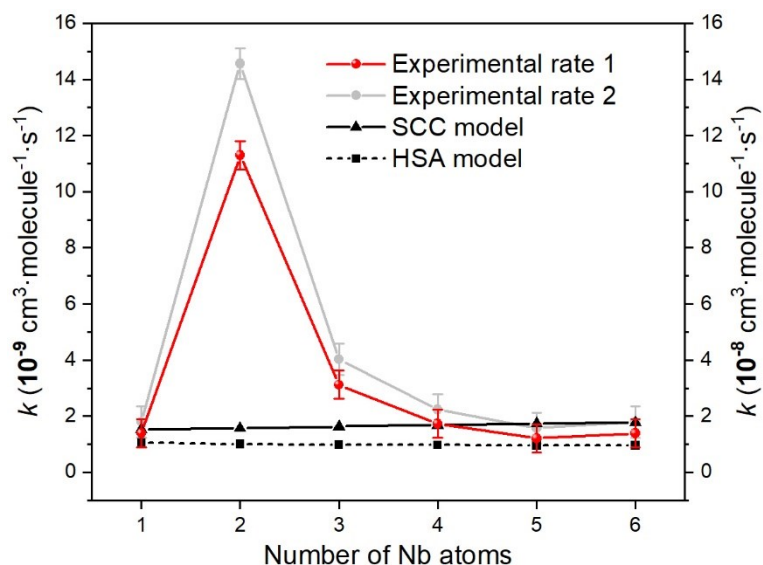

**Figure S16.** The experimentally determined reaction rates of  $\text{Nb}_n^+$  ( $n = 1-6$ ) reacting with  $\text{B}_2\text{H}_6$  using two methods (rate 1 and 2), in a comparison with the theoretically simulated rate constants based on the SCC model and HSA model. The scale and tick labels for experimental rate 2 is displayed on the right axis. The systemic errors are considered through error propagation based on the equations, including the measure of the mass peak intensities, the measure of vacuum, and the estimation of the molecular beam density.

## S2 Optimized Structures and Thermodynamics

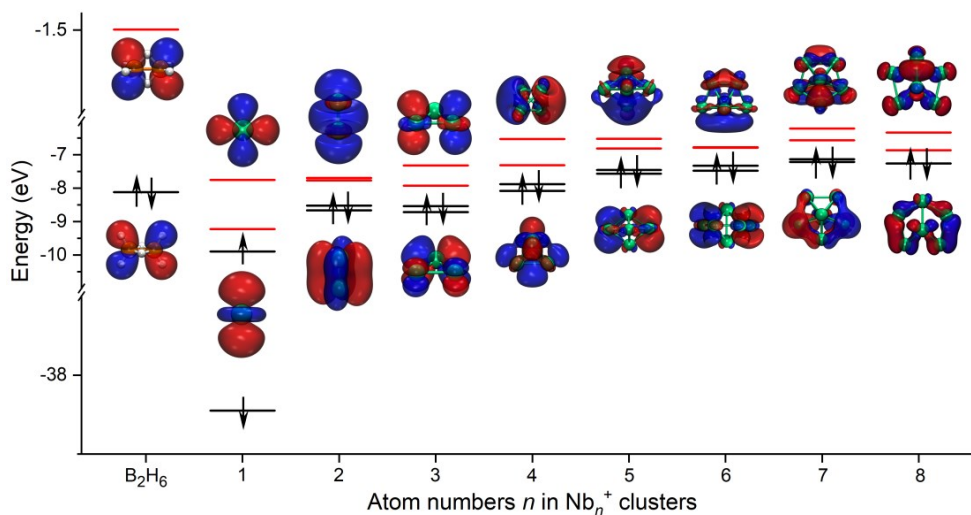

**Figure S17. Frontier orbital analysis.** The highest occupied molecular orbitals (HOMO) and lowest unoccupied molecular orbitals (LUMO) of the  $\text{Nb}_n^+$  clusters in a comparison with that of  $\text{B}_2\text{H}_6$ .

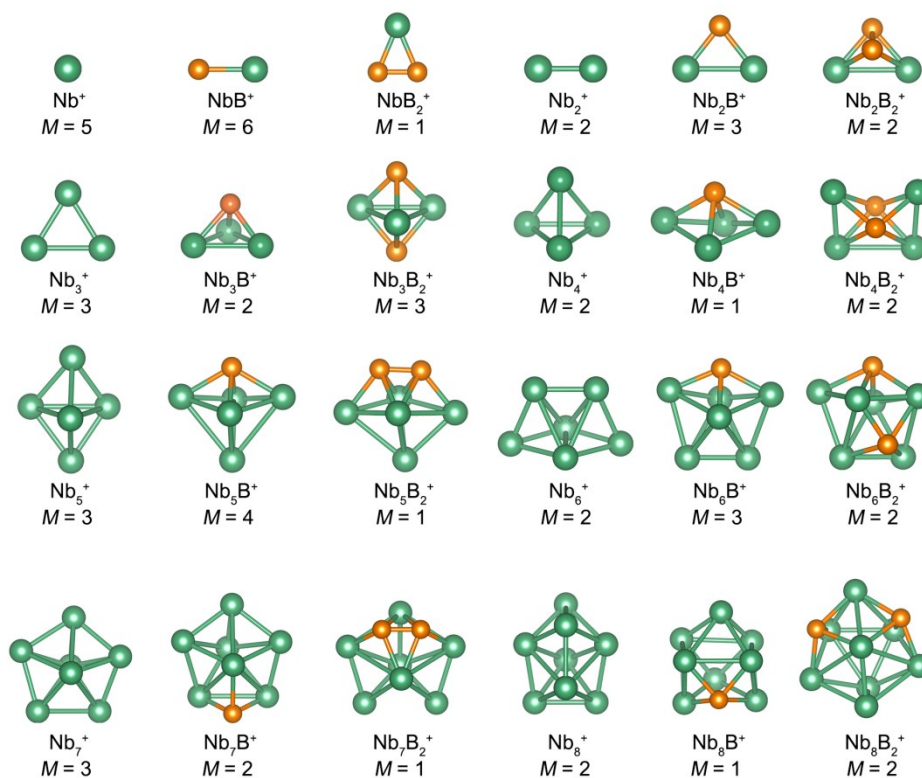

**Figure S18.** The optimized structures of  $\text{Nb}_n\text{B}_m^+$  clusters ( $n = 1-9$ ,  $m = 0-2$ ). Spin multiplicities ( $M$ ) are shown below each isomer.

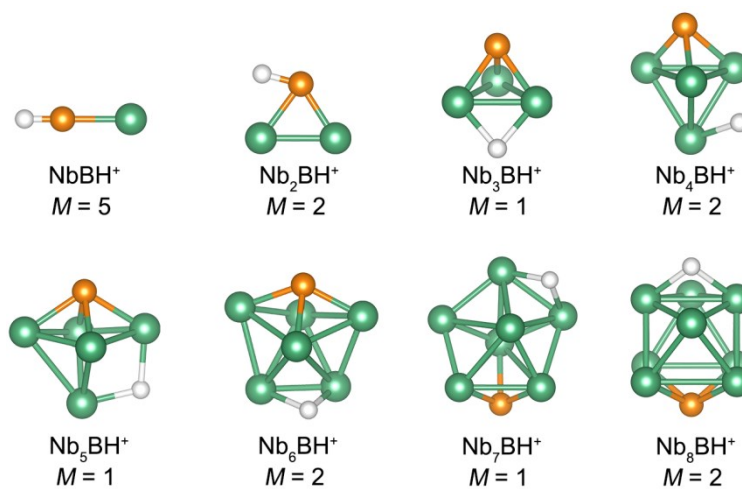

**Figure S19.** The optimized structures of  $\text{Nb}_n\text{BH}^+$  clusters ( $n = 1-8$ ). Spin multiplicities ( $M$ ) are shown below each isomer.

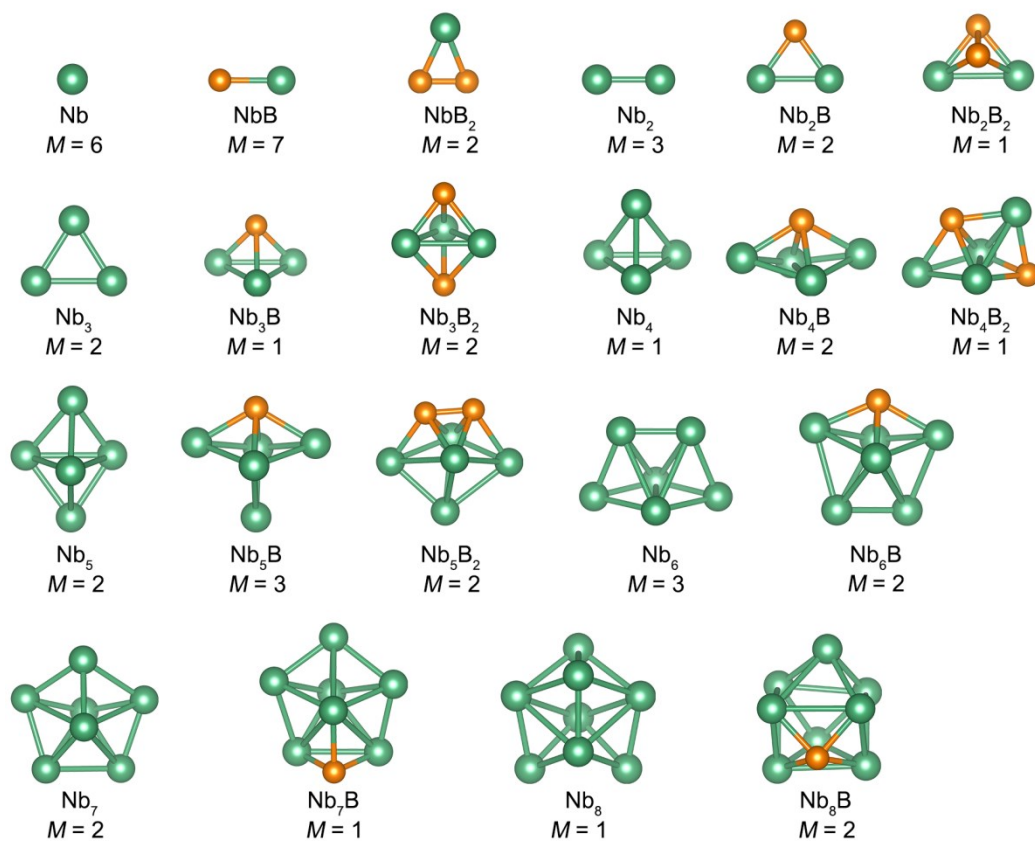

**Figure S20.** The optimized structures of neutral  $\text{Nb}_n\text{B}_m$  clusters ( $n = 1-8$ ,  $m = 0-2$ ). Spin multiplicities ( $M$ ) are shown below each isomer.

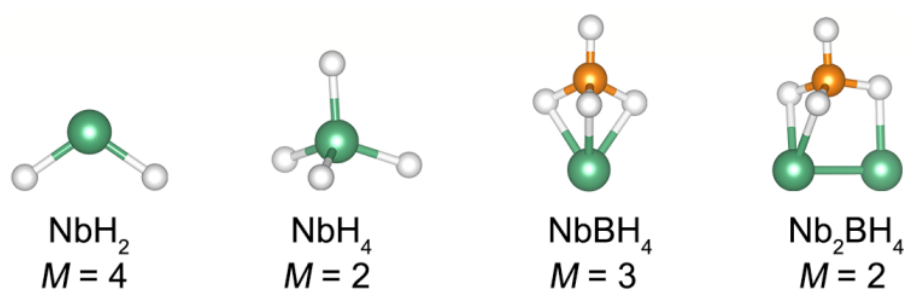

**Figure S21.** The optimized structures of neutral  $\text{Nb}_n\text{B}_x\text{H}_y$  clusters. Spin multiplicities ( $M$ ) are shown below each isomer.

**Table S1. Thermodynamics energy changes ( $\Delta G$ ) for  $\text{Nb}_n^+ + \text{B}_2\text{H}_6 \rightarrow \text{Nb}_n\text{B}_2^+ + 3\text{H}_2$ . The pre-superscripts refer to spin multiplicities. Energies are given in eV.**

| Thermodynamics energy changes (eV)                                                               |                    |
|--------------------------------------------------------------------------------------------------|--------------------|
| ${}^5\text{Nb}^+ + \text{B}_2\text{H}_6 \rightarrow {}^1\text{NbB}_2^+ + 3\text{H}_2$            | $\Delta G = 2.95$  |
| ${}^2\text{Nb}_2^+ + \text{B}_2\text{H}_6 \rightarrow {}^2\text{Nb}_2\text{B}_2^+ + 3\text{H}_2$ | $\Delta G = 1.65$  |
| ${}^3\text{Nb}_3^+ + \text{B}_2\text{H}_6 \rightarrow {}^3\text{Nb}_3\text{B}_2^+ + 3\text{H}_2$ | $\Delta G = -0.20$ |
| ${}^2\text{Nb}_4^+ + \text{B}_2\text{H}_6 \rightarrow {}^2\text{Nb}_4\text{B}_2^+ + 3\text{H}_2$ | $\Delta G = -0.60$ |
| ${}^3\text{Nb}_5^+ + \text{B}_2\text{H}_6 \rightarrow {}^1\text{Nb}_5\text{B}_2^+ + 3\text{H}_2$ | $\Delta G = -1.47$ |
| ${}^2\text{Nb}_6^+ + \text{B}_2\text{H}_6 \rightarrow {}^2\text{Nb}_6\text{B}_2^+ + 3\text{H}_2$ | $\Delta G = -1.52$ |
| ${}^3\text{Nb}_7^+ + \text{B}_2\text{H}_6 \rightarrow {}^1\text{Nb}_7\text{B}_2^+ + 3\text{H}_2$ | $\Delta G = -0.61$ |
| ${}^2\text{Nb}_8^+ + \text{B}_2\text{H}_6 \rightarrow {}^2\text{Nb}_8\text{B}_2^+ + 3\text{H}_2$ | $\Delta G = -0.72$ |

**Table S2. Thermodynamics energy changes ( $\Delta G$ ) for  $\text{Nb}_n^+ + \text{B}_2\text{H}_6 \rightarrow \text{Nb}_n\text{BH}_x^+ + \frac{6-x-y}{2} \text{H}_2 + \text{BH}_y$ . The pre-superscripts refer to spin multiplicities. Energies are given in eV.**

| Thermodynamics energy changes (eV)                                                                           |                    |
|--------------------------------------------------------------------------------------------------------------|--------------------|
| ${}^5\text{Nb}^+ + \text{B}_2\text{H}_6 \rightarrow {}^5\text{NbBH}^+ + \text{BH} + 2\text{H}_2$             | $\Delta G = 5.24$  |
| ${}^2\text{Nb}_2^+ + \text{B}_2\text{H}_6 \rightarrow {}^2\text{Nb}_2\text{BH}^+ + \text{BH} + 2\text{H}_2$  | $\Delta G = 4.74$  |
| ${}^3\text{Nb}_3^+ + \text{B}_2\text{H}_6 \rightarrow {}^1\text{Nb}_3\text{BH}^+ + \text{BH} + 2\text{H}_2$  | $\Delta G = 3.22$  |
| ${}^2\text{Nb}_4^+ + \text{B}_2\text{H}_6 \rightarrow {}^2\text{Nb}_4\text{BH}^+ + \text{BH} + 2\text{H}_2$  | $\Delta G = 3.47$  |
| ${}^3\text{Nb}_5^+ + \text{B}_2\text{H}_6 \rightarrow {}^1\text{Nb}_5\text{BH}^+ + \text{BH} + 2\text{H}_2$  | $\Delta G = 3.05$  |
| ${}^2\text{Nb}_6^+ + \text{B}_2\text{H}_6 \rightarrow {}^2\text{Nb}_6\text{BH}^+ + \text{BH} + 2\text{H}_2$  | $\Delta G = 1.93$  |
| ${}^3\text{Nb}_7^+ + \text{B}_2\text{H}_6 \rightarrow {}^1\text{Nb}_7\text{BH}^+ + \text{BH} + 2\text{H}_2$  | $\Delta G = 3.47$  |
| ${}^2\text{Nb}_8^+ + \text{B}_2\text{H}_6 \rightarrow {}^2\text{Nb}_8\text{BH}^+ + \text{BH} + 2\text{H}_2$  | $\Delta G = 3.03$  |
| ${}^5\text{Nb}^+ + \text{B}_2\text{H}_6 \rightarrow {}^6\text{NbB}^+ + \text{BH}_2 + 2\text{H}_2$            | $\Delta G = 5.61$  |
| ${}^2\text{Nb}_2^+ + \text{B}_2\text{H}_6 \rightarrow {}^3\text{Nb}_2\text{B}^+ + \text{BH}_2 + 2\text{H}_2$ | $\Delta G = 4.69$  |
| ${}^3\text{Nb}_3^+ + \text{B}_2\text{H}_6 \rightarrow {}^2\text{Nb}_3\text{B}^+ + \text{BH}_2 + 2\text{H}_2$ | $\Delta G = 3.09$  |
| ${}^2\text{Nb}_4^+ + \text{B}_2\text{H}_6 \rightarrow {}^1\text{Nb}_4\text{B}^+ + \text{BH}_2 + 2\text{H}_2$ | $\Delta G = 2.90$  |
| ${}^3\text{Nb}_5^+ + \text{B}_2\text{H}_6 \rightarrow {}^4\text{Nb}_5\text{B}^+ + \text{BH}_2 + 2\text{H}_2$ | $\Delta G = 2.85$  |
| ${}^2\text{Nb}_6^+ + \text{B}_2\text{H}_6 \rightarrow {}^3\text{Nb}_6\text{B}^+ + \text{BH}_2 + 2\text{H}_2$ | $\Delta G = 1.58$  |
| ${}^3\text{Nb}_7^+ + \text{B}_2\text{H}_6 \rightarrow {}^2\text{Nb}_7\text{B}^+ + \text{BH}_2 + 2\text{H}_2$ | $\Delta G = 3.23$  |
| ${}^2\text{Nb}_8^+ + \text{B}_2\text{H}_6 \rightarrow {}^1\text{Nb}_8\text{B}^+ + \text{BH}_2 + 2\text{H}_2$ | $\Delta G = 2.95$  |
| ${}^5\text{Nb}^+ + \text{B}_2\text{H}_6 \rightarrow {}^5\text{NbBH}^+ + \text{BH}_3 + \text{H}_2$            | $\Delta G = 1.57$  |
| ${}^2\text{Nb}_2^+ + \text{B}_2\text{H}_6 \rightarrow {}^2\text{Nb}_2\text{BH}^+ + \text{BH}_3 + \text{H}_2$ | $\Delta G = 1.08$  |
| ${}^3\text{Nb}_3^+ + \text{B}_2\text{H}_6 \rightarrow {}^1\text{Nb}_3\text{BH}^+ + \text{BH}_3 + \text{H}_2$ | $\Delta G = -0.44$ |
| ${}^2\text{Nb}_4^+ + \text{B}_2\text{H}_6 \rightarrow {}^2\text{Nb}_4\text{BH}^+ + \text{BH}_3 + \text{H}_2$ | $\Delta G = -0.19$ |
| ${}^3\text{Nb}_5^+ + \text{B}_2\text{H}_6 \rightarrow {}^1\text{Nb}_5\text{BH}^+ + \text{BH}_3 + \text{H}_2$ | $\Delta G = -0.61$ |
| ${}^2\text{Nb}_6^+ + \text{B}_2\text{H}_6 \rightarrow {}^2\text{Nb}_6\text{BH}^+ + \text{BH}_3 + \text{H}_2$ | $\Delta G = -1.73$ |
| ${}^3\text{Nb}_7^+ + \text{B}_2\text{H}_6 \rightarrow {}^1\text{Nb}_7\text{BH}^+ + \text{BH}_3 + \text{H}_2$ | $\Delta G = -0.19$ |
| ${}^2\text{Nb}_8^+ + \text{B}_2\text{H}_6 \rightarrow {}^2\text{Nb}_8\text{BH}^+ + \text{BH}_3 + \text{H}_2$ | $\Delta G = -0.64$ |
| ${}^5\text{Nb}^+ + \text{B}_2\text{H}_6 \rightarrow {}^6\text{NbB}^+ + \text{BH}_4 + \text{H}_2$             | $\Delta G = 4.57$  |
| ${}^2\text{Nb}_2^+ + \text{B}_2\text{H}_6 \rightarrow {}^3\text{Nb}_2\text{B}^+ + \text{BH}_4 + \text{H}_2$  | $\Delta G = 3.65$  |
| ${}^3\text{Nb}_3^+ + \text{B}_2\text{H}_6 \rightarrow {}^2\text{Nb}_3\text{B}^+ + \text{BH}_4 + \text{H}_2$  | $\Delta G = 2.05$  |
| ${}^2\text{Nb}_4^+ + \text{B}_2\text{H}_6 \rightarrow {}^1\text{Nb}_4\text{B}^+ + \text{BH}_4 + \text{H}_2$  | $\Delta G = 1.86$  |
| ${}^3\text{Nb}_5^+ + \text{B}_2\text{H}_6 \rightarrow {}^4\text{Nb}_5\text{B}^+ + \text{BH}_4 + \text{H}_2$  | $\Delta G = 1.81$  |
| ${}^2\text{Nb}_6^+ + \text{B}_2\text{H}_6 \rightarrow {}^3\text{Nb}_6\text{B}^+ + \text{BH}_4 + \text{H}_2$  | $\Delta G = 0.54$  |

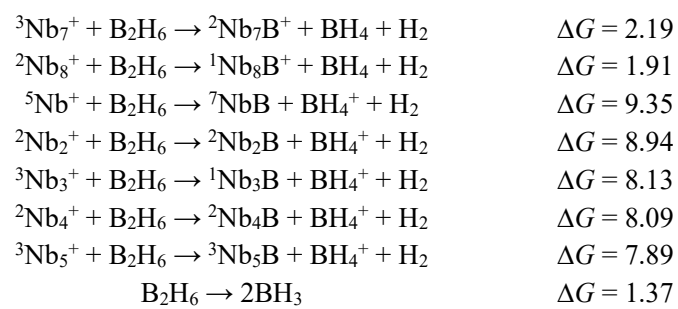

**Table S3. Thermodynamics energy changes ( $\Delta G$ ) for  $\text{Nb}_n^+ + \text{B}_2\text{H}_6 \rightarrow \text{Nb}_{n-x}\text{B}^+ + \text{Nb}_x\text{BH}_4 + \text{H}_2$ . The pre-superscripts refer to spin multiplicities. Energies are given in eV.**

| Thermodynamics energy changes (eV)                                                                                            |                   |
|-------------------------------------------------------------------------------------------------------------------------------|-------------------|
| ${}^2\text{Nb}_2^+ + \text{B}_2\text{H}_6 \rightarrow {}^6\text{NbB}^+ + {}^3\text{NbBH}_4 + \text{H}_2$                      | $\Delta G = 5.48$ |
| ${}^3\text{Nb}_3^+ + \text{B}_2\text{H}_6 \rightarrow {}^3\text{Nb}_2\text{B}^+ + {}^3\text{NbBH}_4 + \text{H}_2$             | $\Delta G = 3.70$ |
| ${}^2\text{Nb}_4^+ + \text{B}_2\text{H}_6 \rightarrow {}^2\text{Nb}_3\text{B}^+ + {}^3\text{NbBH}_4 + \text{H}_2$             | $\Delta G = 3.29$ |
| ${}^3\text{Nb}_5^+ + \text{B}_2\text{H}_6 \rightarrow {}^1\text{Nb}_4\text{B}^+ + {}^3\text{NbBH}_4 + \text{H}_2$             | $\Delta G = 2.78$ |
| ${}^2\text{Nb}_6^+ + \text{B}_2\text{H}_6 \rightarrow {}^4\text{Nb}_5\text{B}^+ + {}^3\text{NbBH}_4 + \text{H}_2$             | $\Delta G = 2.71$ |
| ${}^3\text{Nb}_7^+ + \text{B}_2\text{H}_6 \rightarrow {}^3\text{Nb}_6\text{B}^+ + {}^3\text{NbBH}_4 + \text{H}_2$             | $\Delta G = 2.40$ |
| ${}^2\text{Nb}_8^+ + \text{B}_2\text{H}_6 \rightarrow {}^2\text{Nb}_7\text{B}^+ + {}^3\text{NbBH}_4 + \text{H}_2$             | $\Delta G = 3.51$ |
| ${}^1\text{Nb}_9^+ + \text{B}_2\text{H}_6 \rightarrow {}^1\text{Nb}_8\text{B}^+ + {}^3\text{NbBH}_4 + \text{H}_2$             | $\Delta G = 3.01$ |
| ${}^3\text{Nb}_3^+ + \text{B}_2\text{H}_6 \rightarrow {}^6\text{NbB}^+ + {}^2\text{Nb}_2\text{BH}_4 + \text{H}_2$             | $\Delta G = 5.62$ |
| ${}^2\text{Nb}_4^+ + \text{B}_2\text{H}_6 \rightarrow {}^3\text{Nb}_2\text{B}^+ + {}^2\text{Nb}_2\text{BH}_4 + \text{H}_2$    | $\Delta G = 5.04$ |
| ${}^3\text{Nb}_5^+ + \text{B}_2\text{H}_6 \rightarrow {}^2\text{Nb}_3\text{B}^+ + {}^2\text{Nb}_2\text{BH}_4 + \text{H}_2$    | $\Delta G = 4.31$ |
| ${}^2\text{Nb}_6^+ + \text{B}_2\text{H}_6 \rightarrow {}^1\text{Nb}_4\text{B}^+ + {}^2\text{Nb}_2\text{BH}_4 + \text{H}_2$    | $\Delta G = 3.78$ |
| ${}^3\text{Nb}_7^+ + \text{B}_2\text{H}_6 \rightarrow {}^4\text{Nb}_5\text{B}^+ + {}^2\text{Nb}_2\text{BH}_4 + \text{H}_2$    | $\Delta G = 4.67$ |
| ${}^2\text{Nb}_8^+ + \text{B}_2\text{H}_6 \rightarrow {}^3\text{Nb}_6\text{B}^+ + {}^2\text{Nb}_2\text{BH}_4 + \text{H}_2$    | $\Delta G = 3.83$ |
| ${}^1\text{Nb}_9^+ + \text{B}_2\text{H}_6 \rightarrow {}^2\text{Nb}_7\text{B}^+ + {}^2\text{Nb}_2\text{BH}_4 + \text{H}_2$    | $\Delta G = 4.71$ |
| ${}^2\text{Nb}_{10}^+ + \text{B}_2\text{H}_6 \rightarrow {}^1\text{Nb}_8\text{B}^+ + {}^2\text{Nb}_2\text{BH}_4 + \text{H}_2$ | $\Delta G = 4.49$ |

**Table S4. Thermodynamics energy changes ( $\Delta G$ ) for  $\text{Nb}_n^+ + \text{B}_2\text{H}_6 \rightarrow \text{Nb}_{n-1}\text{B}_2^+ + \text{NbH}_{2x} + (3-x)\text{H}_2$ . The pre-superscripts refer to spin multiplicities. Energies are given in eV.**

| Thermodynamics energy changes (eV)                                                                                  |                   |
|---------------------------------------------------------------------------------------------------------------------|-------------------|
| ${}^2\text{Nb}_2^+ + \text{B}_2\text{H}_6 \rightarrow {}^1\text{NbB}_2^+ + {}^4\text{NbH}_2 + 2\text{H}_2$          | $\Delta G = 7.14$ |
| ${}^2\text{Nb}_2^+ + \text{B}_2\text{H}_6 \rightarrow {}^1\text{NbB}_2^+ + {}^2\text{NbH}_4 + \text{H}_2$           | $\Delta G = 5.81$ |
| ${}^3\text{Nb}_3^+ + \text{B}_2\text{H}_6 \rightarrow {}^2\text{Nb}_2\text{B}_2^+ + {}^4\text{NbH}_2 + 2\text{H}_2$ | $\Delta G = 4.98$ |
| ${}^3\text{Nb}_3^+ + \text{B}_2\text{H}_6 \rightarrow {}^2\text{Nb}_2\text{B}_2^+ + {}^2\text{NbH}_4 + \text{H}_2$  | $\Delta G = 3.64$ |
| ${}^2\text{Nb}_4^+ + \text{B}_2\text{H}_6 \rightarrow {}^3\text{Nb}_3\text{B}_2^+ + {}^4\text{NbH}_2 + 2\text{H}_2$ | $\Delta G = 4.32$ |
| ${}^2\text{Nb}_4^+ + \text{B}_2\text{H}_6 \rightarrow {}^3\text{Nb}_3\text{B}_2^+ + {}^2\text{NbH}_4 + \text{H}_2$  | $\Delta G = 2.99$ |
| ${}^3\text{Nb}_5^+ + \text{B}_2\text{H}_6 \rightarrow {}^2\text{Nb}_4\text{B}_2^+ + {}^4\text{NbH}_2 + 2\text{H}_2$ | $\Delta G = 3.61$ |
| ${}^3\text{Nb}_5^+ + \text{B}_2\text{H}_6 \rightarrow {}^2\text{Nb}_4\text{B}_2^+ + {}^2\text{NbH}_4 + \text{H}_2$  | $\Delta G = 2.27$ |
| ${}^2\text{Nb}_6^+ + \text{B}_2\text{H}_6 \rightarrow {}^1\text{Nb}_5\text{B}_2^+ + {}^4\text{NbH}_2 + 2\text{H}_2$ | $\Delta G = 2.72$ |
| ${}^2\text{Nb}_6^+ + \text{B}_2\text{H}_6 \rightarrow {}^1\text{Nb}_5\text{B}_2^+ + {}^2\text{NbH}_4 + \text{H}_2$  | $\Delta G = 1.39$ |
| ${}^3\text{Nb}_7^+ + \text{B}_2\text{H}_6 \rightarrow {}^2\text{Nb}_6\text{B}_2^+ + {}^4\text{NbH}_2 + 2\text{H}_2$ | $\Delta G = 3.62$ |
| ${}^3\text{Nb}_7^+ + \text{B}_2\text{H}_6 \rightarrow {}^2\text{Nb}_6\text{B}_2^+ + {}^2\text{NbH}_4 + \text{H}_2$  | $\Delta G = 2.29$ |
| ${}^2\text{Nb}_8^+ + \text{B}_2\text{H}_6 \rightarrow {}^1\text{Nb}_7\text{B}_2^+ + {}^4\text{NbH}_2 + 2\text{H}_2$ | $\Delta G = 4.01$ |
| ${}^2\text{Nb}_8^+ + \text{B}_2\text{H}_6 \rightarrow {}^1\text{Nb}_7\text{B}_2^+ + {}^2\text{NbH}_4 + \text{H}_2$  | $\Delta G = 2.67$ |
| ${}^1\text{Nb}_9^+ + \text{B}_2\text{H}_6 \rightarrow {}^2\text{Nb}_8\text{B}_2^+ + {}^4\text{NbH}_2 + 2\text{H}_2$ | $\Delta G = 3.67$ |
| ${}^1\text{Nb}_9^+ + \text{B}_2\text{H}_6 \rightarrow {}^2\text{Nb}_8\text{B}_2^+ + {}^2\text{NbH}_4 + \text{H}_2$  | $\Delta G = 2.34$ |

**Table S5. Thermodynamics energy changes ( $\Delta G$ ) for  $\text{Nb}_n^+ + \text{B}_2\text{H}_6 \rightarrow \text{Nb}_x\text{B}_2^+ + \text{Nb}_{n-x} + 3\text{H}_2$ . The pre-superscripts refer to spin multiplicities. Energies are given in eV.**

| Thermodynamics energy changes (eV)                                                                                    |                   |
|-----------------------------------------------------------------------------------------------------------------------|-------------------|
| ${}^2\text{Nb}_2^+ + \text{B}_2\text{H}_6 \rightarrow {}^1\text{NbB}_2^+ + {}^6\text{Nb} + 3\text{H}_2$               | $\Delta G = 8.33$ |
| ${}^3\text{Nb}_3^+ + \text{B}_2\text{H}_6 \rightarrow {}^1\text{NbB}_2^+ + {}^3\text{Nb}_2 + 3\text{H}_2$             | $\Delta G = 7.90$ |
| ${}^2\text{Nb}_4^+ + \text{B}_2\text{H}_6 \rightarrow {}^1\text{NbB}_2^+ + {}^2\text{Nb}_3 + 3\text{H}_2$             | $\Delta G = 9.46$ |
| ${}^3\text{Nb}_5^+ + \text{B}_2\text{H}_6 \rightarrow {}^1\text{NbB}_2^+ + {}^1\text{Nb}_4 + 3\text{H}_2$             | $\Delta G = 9.44$ |
| ${}^2\text{Nb}_6^+ + \text{B}_2\text{H}_6 \rightarrow {}^1\text{NbB}_2^+ + {}^2\text{Nb}_5 + 3\text{H}_2$             | $\Delta G = 9.71$ |
| ${}^3\text{Nb}_3^+ + \text{B}_2\text{H}_6 \rightarrow {}^2\text{Nb}_2\text{B}_2^+ + {}^6\text{Nb} + 3\text{H}_2$      | $\Delta G = 6.16$ |
| ${}^2\text{Nb}_4^+ + \text{B}_2\text{H}_6 \rightarrow {}^2\text{Nb}_2\text{B}_2^+ + {}^3\text{Nb}_2 + 3\text{H}_2$    | $\Delta G = 6.93$ |
| ${}^3\text{Nb}_5^+ + \text{B}_2\text{H}_6 \rightarrow {}^2\text{Nb}_2\text{B}_2^+ + {}^2\text{Nb}_3 + 3\text{H}_2$    | $\Delta G = 8.16$ |
| ${}^2\text{Nb}_6^+ + \text{B}_2\text{H}_6 \rightarrow {}^2\text{Nb}_2\text{B}_2^+ + {}^1\text{Nb}_4 + 3\text{H}_2$    | $\Delta G = 8.13$ |
| ${}^3\text{Nb}_7^+ + \text{B}_2\text{H}_6 \rightarrow {}^2\text{Nb}_2\text{B}_2^+ + {}^2\text{Nb}_5 + 3\text{H}_2$    | $\Delta G = 9.35$ |
| ${}^2\text{Nb}_4^+ + \text{B}_2\text{H}_6 \rightarrow {}^3\text{Nb}_3\text{B}_2^+ + {}^6\text{Nb} + 3\text{H}_2$      | $\Delta G = 5.51$ |
| ${}^3\text{Nb}_5^+ + \text{B}_2\text{H}_6 \rightarrow {}^3\text{Nb}_3\text{B}_2^+ + {}^3\text{Nb}_2 + 3\text{H}_2$    | $\Delta G = 5.96$ |
| ${}^2\text{Nb}_6^+ + \text{B}_2\text{H}_6 \rightarrow {}^3\text{Nb}_3\text{B}_2^+ + {}^2\text{Nb}_3 + 3\text{H}_2$    | $\Delta G = 7.17$ |
| ${}^3\text{Nb}_7^+ + \text{B}_2\text{H}_6 \rightarrow {}^3\text{Nb}_3\text{B}_2^+ + {}^1\text{Nb}_4 + 3\text{H}_2$    | $\Delta G = 8.10$ |
| ${}^2\text{Nb}_8^+ + \text{B}_2\text{H}_6 \rightarrow {}^3\text{Nb}_3\text{B}_2^+ + {}^2\text{Nb}_5 + 3\text{H}_2$    | $\Delta G = 8.79$ |
| ${}^3\text{Nb}_5^+ + \text{B}_2\text{H}_6 \rightarrow {}^2\text{Nb}_4\text{B}_2^+ + {}^6\text{Nb} + 3\text{H}_2$      | $\Delta G = 4.79$ |
| ${}^2\text{Nb}_6^+ + \text{B}_2\text{H}_6 \rightarrow {}^2\text{Nb}_4\text{B}_2^+ + {}^3\text{Nb}_2 + 3\text{H}_2$    | $\Delta G = 5.22$ |
| ${}^3\text{Nb}_7^+ + \text{B}_2\text{H}_6 \rightarrow {}^2\text{Nb}_4\text{B}_2^+ + {}^2\text{Nb}_3 + 3\text{H}_2$    | $\Delta G = 7.39$ |
| ${}^2\text{Nb}_8^+ + \text{B}_2\text{H}_6 \rightarrow {}^2\text{Nb}_4\text{B}_2^+ + {}^1\text{Nb}_4 + 3\text{H}_2$    | $\Delta G = 7.79$ |
| ${}^1\text{Nb}_9^+ + \text{B}_2\text{H}_6 \rightarrow {}^2\text{Nb}_4\text{B}_2^+ + {}^2\text{Nb}_5 + 3\text{H}_2$    | $\Delta G = 8.25$ |
| ${}^2\text{Nb}_6^+ + \text{B}_2\text{H}_6 \rightarrow {}^1\text{Nb}_5\text{B}_2^+ + {}^6\text{Nb} + 3\text{H}_2$      | $\Delta G = 3.90$ |
| ${}^3\text{Nb}_7^+ + \text{B}_2\text{H}_6 \rightarrow {}^1\text{Nb}_5\text{B}_2^+ + {}^3\text{Nb}_2 + 3\text{H}_2$    | $\Delta G = 5.29$ |
| ${}^2\text{Nb}_8^+ + \text{B}_2\text{H}_6 \rightarrow {}^1\text{Nb}_5\text{B}_2^+ + {}^2\text{Nb}_3 + 3\text{H}_2$    | $\Delta G = 6.93$ |
| ${}^1\text{Nb}_9^+ + \text{B}_2\text{H}_6 \rightarrow {}^1\text{Nb}_5\text{B}_2^+ + {}^1\text{Nb}_4 + 3\text{H}_2$    | $\Delta G = 7.10$ |
| ${}^2\text{Nb}_{10}^+ + \text{B}_2\text{H}_6 \rightarrow {}^1\text{Nb}_5\text{B}_2^+ + {}^2\text{Nb}_5 + 3\text{H}_2$ | $\Delta G = 7.84$ |
| ${}^3\text{Nb}_7^+ + \text{B}_2\text{H}_6 \rightarrow {}^2\text{Nb}_6\text{B}_2^+ + {}^6\text{Nb} + 3\text{H}_2$      | $\Delta G = 4.81$ |
| ${}^2\text{Nb}_8^+ + \text{B}_2\text{H}_6 \rightarrow {}^2\text{Nb}_6\text{B}_2^+ + {}^3\text{Nb}_2 + 3\text{H}_2$    | $\Delta G = 5.67$ |
| ${}^1\text{Nb}_9^+ + \text{B}_2\text{H}_6 \rightarrow {}^2\text{Nb}_6\text{B}_2^+ + {}^2\text{Nb}_3 + 3\text{H}_2$    | $\Delta G = 7.08$ |
| ${}^2\text{Nb}_{10}^+ + \text{B}_2\text{H}_6 \rightarrow {}^2\text{Nb}_6\text{B}_2^+ + {}^1\text{Nb}_4 + 3\text{H}_2$ | $\Delta G = 7.53$ |
| ${}^2\text{Nb}_8^+ + \text{B}_2\text{H}_6 \rightarrow {}^1\text{Nb}_7\text{B}_2^+ + {}^6\text{Nb} + 3\text{H}_2$      | $\Delta G = 5.19$ |
| ${}^1\text{Nb}_9^+ + \text{B}_2\text{H}_6 \rightarrow {}^1\text{Nb}_7\text{B}_2^+ + {}^3\text{Nb}_2 + 3\text{H}_2$    | $\Delta G = 5.82$ |
| ${}^2\text{Nb}_{10}^+ + \text{B}_2\text{H}_6 \rightarrow {}^1\text{Nb}_7\text{B}_2^+ + {}^2\text{Nb}_3 + 3\text{H}_2$ | $\Delta G = 7.51$ |
| ${}^1\text{Nb}_9^+ + \text{B}_2\text{H}_6 \rightarrow {}^2\text{Nb}_8\text{B}_2^+ + {}^6\text{Nb} + 3\text{H}_2$      | $\Delta G = 4.85$ |
| ${}^2\text{Nb}_{10}^+ + \text{B}_2\text{H}_6 \rightarrow {}^2\text{Nb}_8\text{B}_2^+ + {}^3\text{Nb}_2 + 3\text{H}_2$ | $\Delta G = 5.77$ |

**Table S6. Thermodynamics energy changes ( $\Delta G$ ) for  $\text{Nb}_n^+ + \text{B}_2\text{H}_6 \rightarrow \text{Nb}_x^+ + \text{Nb}_{n-x}\text{B}_2 + 3\text{H}_2$ . The pre-superscripts refer to spin multiplicities. Energies are given in eV.**

| Thermodynamics energy changes (eV)                                                                                    |                   |
|-----------------------------------------------------------------------------------------------------------------------|-------------------|
| ${}^2\text{Nb}_2^+ + \text{B}_2\text{H}_6 \rightarrow {}^5\text{Nb}^+ + {}^2\text{NbB}_2 + 3\text{H}_2$               | $\Delta G = 7.48$ |
| ${}^3\text{Nb}_3^+ + \text{B}_2\text{H}_6 \rightarrow {}^5\text{Nb}^+ + {}^1\text{Nb}_2\text{B}_2 + 3\text{H}_2$      | $\Delta G = 6.59$ |
| ${}^2\text{Nb}_4^+ + \text{B}_2\text{H}_6 \rightarrow {}^5\text{Nb}^+ + {}^2\text{Nb}_3\text{B}_2 + 3\text{H}_2$      | $\Delta G = 5.95$ |
| ${}^3\text{Nb}_5^+ + \text{B}_2\text{H}_6 \rightarrow {}^5\text{Nb}^+ + {}^1\text{Nb}_4\text{B}_2 + 3\text{H}_2$      | $\Delta G = 6.11$ |
| ${}^2\text{Nb}_6^+ + \text{B}_2\text{H}_6 \rightarrow {}^5\text{Nb}^+ + {}^2\text{Nb}_5\text{B}_2 + 3\text{H}_2$      | $\Delta G = 5.31$ |
| ${}^3\text{Nb}_3^+ + \text{B}_2\text{H}_6 \rightarrow {}^2\text{Nb}_2^+ + {}^2\text{NbB}_2 + 3\text{H}_2$             | $\Delta G = 6.62$ |
| ${}^2\text{Nb}_4^+ + \text{B}_2\text{H}_6 \rightarrow {}^2\text{Nb}_2^+ + {}^1\text{Nb}_2\text{B}_2 + 3\text{H}_2$    | $\Delta G = 6.92$ |
| ${}^3\text{Nb}_5^+ + \text{B}_2\text{H}_6 \rightarrow {}^2\text{Nb}_2^+ + {}^2\text{Nb}_3\text{B}_2 + 3\text{H}_2$    | $\Delta G = 5.96$ |
| ${}^2\text{Nb}_6^+ + \text{B}_2\text{H}_6 \rightarrow {}^2\text{Nb}_2^+ + {}^1\text{Nb}_4\text{B}_2 + 3\text{H}_2$    | $\Delta G = 6.10$ |
| ${}^3\text{Nb}_7^+ + \text{B}_2\text{H}_6 \rightarrow {}^2\text{Nb}_2^+ + {}^2\text{Nb}_5\text{B}_2 + 3\text{H}_2$    | $\Delta G = 6.26$ |
| ${}^2\text{Nb}_4^+ + \text{B}_2\text{H}_6 \rightarrow {}^3\text{Nb}_3^+ + {}^2\text{NbB}_2 + 3\text{H}_2$             | $\Delta G = 7.81$ |
| ${}^3\text{Nb}_5^+ + \text{B}_2\text{H}_6 \rightarrow {}^3\text{Nb}_3^+ + {}^1\text{Nb}_2\text{B}_2 + 3\text{H}_2$    | $\Delta G = 7.79$ |
| ${}^2\text{Nb}_6^+ + \text{B}_2\text{H}_6 \rightarrow {}^3\text{Nb}_3^+ + {}^2\text{Nb}_3\text{B}_2 + 3\text{H}_2$    | $\Delta G = 6.81$ |
| ${}^3\text{Nb}_7^+ + \text{B}_2\text{H}_6 \rightarrow {}^3\text{Nb}_3^+ + {}^1\text{Nb}_4\text{B}_2 + 3\text{H}_2$    | $\Delta G = 7.91$ |
| ${}^2\text{Nb}_8^+ + \text{B}_2\text{H}_6 \rightarrow {}^3\text{Nb}_3^+ + {}^2\text{Nb}_5\text{B}_2 + 3\text{H}_2$    | $\Delta G = 7.54$ |
| ${}^3\text{Nb}_5^+ + \text{B}_2\text{H}_6 \rightarrow {}^2\text{Nb}_4^+ + {}^2\text{NbB}_2 + 3\text{H}_2$             | $\Delta G = 7.49$ |
| ${}^2\text{Nb}_6^+ + \text{B}_2\text{H}_6 \rightarrow {}^2\text{Nb}_4^+ + {}^1\text{Nb}_2\text{B}_2 + 3\text{H}_2$    | $\Delta G = 7.45$ |
| ${}^3\text{Nb}_7^+ + \text{B}_2\text{H}_6 \rightarrow {}^2\text{Nb}_4^+ + {}^2\text{Nb}_3\text{B}_2 + 3\text{H}_2$    | $\Delta G = 7.43$ |
| ${}^2\text{Nb}_8^+ + \text{B}_2\text{H}_6 \rightarrow {}^2\text{Nb}_4^+ + {}^1\text{Nb}_4\text{B}_2 + 3\text{H}_2$    | $\Delta G = 7.99$ |
| ${}^1\text{Nb}_9^+ + \text{B}_2\text{H}_6 \rightarrow {}^2\text{Nb}_4^+ + {}^2\text{Nb}_5\text{B}_2 + 3\text{H}_2$    | $\Delta G = 7.40$ |
| ${}^2\text{Nb}_6^+ + \text{B}_2\text{H}_6 \rightarrow {}^3\text{Nb}_5^+ + {}^2\text{NbB}_2 + 3\text{H}_2$             | $\Delta G = 7.47$ |
| ${}^3\text{Nb}_7^+ + \text{B}_2\text{H}_6 \rightarrow {}^3\text{Nb}_5^+ + {}^1\text{Nb}_2\text{B}_2 + 3\text{H}_2$    | $\Delta G = 8.39$ |
| ${}^2\text{Nb}_8^+ + \text{B}_2\text{H}_6 \rightarrow {}^3\text{Nb}_5^+ + {}^2\text{Nb}_3\text{B}_2 + 3\text{H}_2$    | $\Delta G = 7.84$ |
| ${}^1\text{Nb}_9^+ + \text{B}_2\text{H}_6 \rightarrow {}^3\text{Nb}_5^+ + {}^1\text{Nb}_4\text{B}_2 + 3\text{H}_2$    | $\Delta G = 8.18$ |
| ${}^2\text{Nb}_{10}^+ + \text{B}_2\text{H}_6 \rightarrow {}^3\text{Nb}_5^+ + {}^2\text{Nb}_5\text{B}_2 + 3\text{H}_2$ | $\Delta G = 7.86$ |
| ${}^3\text{Nb}_7^+ + \text{B}_2\text{H}_6 \rightarrow {}^2\text{Nb}_6^+ + {}^2\text{NbB}_2 + 3\text{H}_2$             | $\Delta G = 8.43$ |
| ${}^2\text{Nb}_8^+ + \text{B}_2\text{H}_6 \rightarrow {}^2\text{Nb}_6^+ + {}^1\text{Nb}_2\text{B}_2 + 3\text{H}_2$    | $\Delta G = 8.82$ |
| ${}^1\text{Nb}_9^+ + \text{B}_2\text{H}_6 \rightarrow {}^2\text{Nb}_6^+ + {}^2\text{Nb}_3\text{B}_2 + 3\text{H}_2$    | $\Delta G = 8.04$ |
| ${}^2\text{Nb}_{10}^+ + \text{B}_2\text{H}_6 \rightarrow {}^2\text{Nb}_6^+ + {}^1\text{Nb}_4\text{B}_2 + 3\text{H}_2$ | $\Delta G = 8.66$ |
| ${}^2\text{Nb}_8^+ + \text{B}_2\text{H}_6 \rightarrow {}^1\text{Nb}_7^+ + {}^2\text{NbB}_2 + 3\text{H}_2$             | $\Delta G = 7.90$ |
| ${}^1\text{Nb}_9^+ + \text{B}_2\text{H}_6 \rightarrow {}^1\text{Nb}_7^+ + {}^1\text{Nb}_2\text{B}_2 + 3\text{H}_2$    | $\Delta G = 8.06$ |
| ${}^2\text{Nb}_{10}^+ + \text{B}_2\text{H}_6 \rightarrow {}^1\text{Nb}_7^+ + {}^2\text{Nb}_3\text{B}_2 + 3\text{H}_2$ | $\Delta G = 7.56$ |
| ${}^1\text{Nb}_9^+ + \text{B}_2\text{H}_6 \rightarrow {}^2\text{Nb}_8^+ + {}^2\text{NbB}_2 + 3\text{H}_2$             | $\Delta G = 7.67$ |
| ${}^2\text{Nb}_{10}^+ + \text{B}_2\text{H}_6 \rightarrow {}^2\text{Nb}_8^+ + {}^1\text{Nb}_2\text{B}_2 + 3\text{H}_2$ | $\Delta G = 8.11$ |
| ${}^2\text{Nb}_{10}^+ + \text{B}_2\text{H}_6 \rightarrow {}^1\text{Nb}_9^+ + {}^2\text{NbB}_2 + 3\text{H}_2$          | $\Delta G = 7.95$ |



**Table S7. Thermodynamics energy changes ( $\Delta G$ ) for  $\text{Nb}_n^+ + \text{B}_2\text{H}_6 \rightarrow \text{Nb}_x\text{B}^+ + \text{Nb}_{n-x}\text{B} + 3\text{H}_2$ . The pre-superscripts refer to spin multiplicities. Energies are given in eV.**

| Thermodynamics energy changes (eV)                                                                                          |                    |
|-----------------------------------------------------------------------------------------------------------------------------|--------------------|
| ${}^2\text{Nb}_2^+ + \text{B}_2\text{H}_6 \rightarrow {}^6\text{NbB}^+ + {}^7\text{NbB} + 3\text{H}_2$                      | $\Delta G = 10.00$ |
| ${}^3\text{Nb}_3^+ + \text{B}_2\text{H}_6 \rightarrow {}^6\text{NbB}^+ + {}^2\text{Nb}_2\text{B} + 3\text{H}_2$             | $\Delta G = 8.73$  |
| ${}^2\text{Nb}_4^+ + \text{B}_2\text{H}_6 \rightarrow {}^6\text{NbB}^+ + {}^1\text{Nb}_3\text{B} + 3\text{H}_2$             | $\Delta G = 9.12$  |
| ${}^3\text{Nb}_5^+ + \text{B}_2\text{H}_6 \rightarrow {}^6\text{NbB}^+ + {}^2\text{Nb}_4\text{B} + 3\text{H}_2$             | $\Delta G = 8.75$  |
| ${}^2\text{Nb}_6^+ + \text{B}_2\text{H}_6 \rightarrow {}^6\text{NbB}^+ + {}^3\text{Nb}_5\text{B} + 3\text{H}_2$             | $\Delta G = 8.53$  |
| ${}^3\text{Nb}_3^+ + \text{B}_2\text{H}_6 \rightarrow {}^3\text{Nb}_2\text{B}^+ + {}^7\text{NbB} + 3\text{H}_2$             | $\Delta G = 8.22$  |
| ${}^2\text{Nb}_4^+ + \text{B}_2\text{H}_6 \rightarrow {}^3\text{Nb}_2\text{B}^+ + {}^2\text{Nb}_2\text{B} + 3\text{H}_2$    | $\Delta G = 8.15$  |
| ${}^3\text{Nb}_5^+ + \text{B}_2\text{H}_6 \rightarrow {}^3\text{Nb}_2\text{B}^+ + {}^1\text{Nb}_3\text{B} + 3\text{H}_2$    | $\Delta G = 8.21$  |
| ${}^2\text{Nb}_6^+ + \text{B}_2\text{H}_6 \rightarrow {}^3\text{Nb}_2\text{B}^+ + {}^2\text{Nb}_4\text{B} + 3\text{H}_2$    | $\Delta G = 7.83$  |
| ${}^3\text{Nb}_7^+ + \text{B}_2\text{H}_6 \rightarrow {}^3\text{Nb}_2\text{B}^+ + {}^3\text{Nb}_5\text{B} + 3\text{H}_2$    | $\Delta G = 8.56$  |
| ${}^2\text{Nb}_4^+ + \text{B}_2\text{H}_6 \rightarrow {}^2\text{Nb}_3\text{B}^+ + {}^7\text{NbB} + 3\text{H}_2$             | $\Delta G = 7.81$  |
| ${}^3\text{Nb}_5^+ + \text{B}_2\text{H}_6 \rightarrow {}^2\text{Nb}_3\text{B}^+ + {}^2\text{Nb}_2\text{B} + 3\text{H}_2$    | $\Delta G = 7.41$  |
| ${}^2\text{Nb}_6^+ + \text{B}_2\text{H}_6 \rightarrow {}^2\text{Nb}_3\text{B}^+ + {}^1\text{Nb}_3\text{B} + 3\text{H}_2$    | $\Delta G = 7.46$  |
| ${}^3\text{Nb}_7^+ + \text{B}_2\text{H}_6 \rightarrow {}^2\text{Nb}_3\text{B}^+ + {}^2\text{Nb}_4\text{B} + 3\text{H}_2$    | $\Delta G = 8.03$  |
| ${}^2\text{Nb}_8^+ + \text{B}_2\text{H}_6 \rightarrow {}^2\text{Nb}_3\text{B}^+ + {}^3\text{Nb}_5\text{B} + 3\text{H}_2$    | $\Delta G = 8.24$  |
| ${}^3\text{Nb}_5^+ + \text{B}_2\text{H}_6 \rightarrow {}^1\text{Nb}_4\text{B}^+ + {}^7\text{NbB} + 3\text{H}_2$             | $\Delta G = 7.30$  |
| ${}^2\text{Nb}_6^+ + \text{B}_2\text{H}_6 \rightarrow {}^1\text{Nb}_4\text{B}^+ + {}^2\text{Nb}_2\text{B} + 3\text{H}_2$    | $\Delta G = 6.89$  |
| ${}^3\text{Nb}_7^+ + \text{B}_2\text{H}_6 \rightarrow {}^1\text{Nb}_4\text{B}^+ + {}^1\text{Nb}_3\text{B} + 3\text{H}_2$    | $\Delta G = 7.89$  |
| ${}^2\text{Nb}_8^+ + \text{B}_2\text{H}_6 \rightarrow {}^1\text{Nb}_4\text{B}^+ + {}^2\text{Nb}_4\text{B} + 3\text{H}_2$    | $\Delta G = 7.94$  |
| ${}^1\text{Nb}_9^+ + \text{B}_2\text{H}_6 \rightarrow {}^1\text{Nb}_4\text{B}^+ + {}^3\text{Nb}_5\text{B} + 3\text{H}_2$    | $\Delta G = 7.92$  |
| ${}^2\text{Nb}_6^+ + \text{B}_2\text{H}_6 \rightarrow {}^4\text{Nb}_5\text{B}^+ + {}^7\text{NbB} + 3\text{H}_2$             | $\Delta G = 7.24$  |
| ${}^3\text{Nb}_7^+ + \text{B}_2\text{H}_6 \rightarrow {}^4\text{Nb}_5\text{B}^+ + {}^2\text{Nb}_2\text{B} + 3\text{H}_2$    | $\Delta G = 7.78$  |
| ${}^2\text{Nb}_8^+ + \text{B}_2\text{H}_6 \rightarrow {}^4\text{Nb}_5\text{B}^+ + {}^1\text{Nb}_3\text{B} + 3\text{H}_2$    | $\Delta G = 8.25$  |
| ${}^1\text{Nb}_9^+ + \text{B}_2\text{H}_6 \rightarrow {}^4\text{Nb}_5\text{B}^+ + {}^2\text{Nb}_4\text{B} + 3\text{H}_2$    | $\Delta G = 8.07$  |
| ${}^2\text{Nb}_{10}^+ + \text{B}_2\text{H}_6 \rightarrow {}^4\text{Nb}_5\text{B}^+ + {}^3\text{Nb}_5\text{B} + 3\text{H}_2$ | $\Delta G = 8.33$  |
| ${}^3\text{Nb}_7^+ + \text{B}_2\text{H}_6 \rightarrow {}^3\text{Nb}_6\text{B}^+ + {}^7\text{NbB} + 3\text{H}_2$             | $\Delta G = 6.92$  |
| ${}^2\text{Nb}_8^+ + \text{B}_2\text{H}_6 \rightarrow {}^3\text{Nb}_6\text{B}^+ + {}^2\text{Nb}_2\text{B} + 3\text{H}_2$    | $\Delta G = 6.93$  |
| ${}^1\text{Nb}_9^+ + \text{B}_2\text{H}_6 \rightarrow {}^3\text{Nb}_6\text{B}^+ + {}^1\text{Nb}_3\text{B} + 3\text{H}_2$    | $\Delta G = 7.18$  |
| ${}^2\text{Nb}_{10}^+ + \text{B}_2\text{H}_6 \rightarrow {}^3\text{Nb}_6\text{B}^+ + {}^2\text{Nb}_4\text{B} + 3\text{H}_2$ | $\Delta G = 7.28$  |
| ${}^2\text{Nb}_8^+ + \text{B}_2\text{H}_6 \rightarrow {}^2\text{Nb}_7\text{B}^+ + {}^7\text{NbB} + 3\text{H}_2$             | $\Delta G = 8.04$  |
| ${}^1\text{Nb}_9^+ + \text{B}_2\text{H}_6 \rightarrow {}^2\text{Nb}_7\text{B}^+ + {}^2\text{Nb}_2\text{B} + 3\text{H}_2$    | $\Delta G = 7.82$  |
| ${}^2\text{Nb}_{10}^+ + \text{B}_2\text{H}_6 \rightarrow {}^2\text{Nb}_7\text{B}^+ + {}^1\text{Nb}_3\text{B} + 3\text{H}_2$ | $\Delta G = 8.35$  |
| ${}^1\text{Nb}_9^+ + \text{B}_2\text{H}_6 \rightarrow {}^1\text{Nb}_8\text{B}^+ + {}^7\text{NbB} + 3\text{H}_2$             | $\Delta G = 7.53$  |
| ${}^2\text{Nb}_{10}^+ + \text{B}_2\text{H}_6 \rightarrow {}^1\text{Nb}_8\text{B}^+ + {}^2\text{Nb}_2\text{B} + 3\text{H}_2$ | $\Delta G = 7.60$  |

**Table S8. Thermodynamics energy changes ( $\Delta G$ ) for  $\text{Nb}_n^+ + \text{Nb}_m^+ + \text{B}_2\text{H}_6 \rightarrow \text{Nb}_n\text{B}^+ + \text{Nb}_m\text{B}^+ + 3\text{H}_2$ . The pre-superscripts refer to spin multiplicities. Energies are given in eV.**

| Thermodynamics energy changes (eV)                                                                                                     |                    |
|----------------------------------------------------------------------------------------------------------------------------------------|--------------------|
| $2\ ^5\text{Nb}^+ + \text{B}_2\text{H}_6 \rightarrow 2\ ^6\text{NbB}^+ + 3\text{H}_2$                                                  | $\Delta G = 4.79$  |
| $^5\text{Nb}^+ + ^2\text{Nb}_2^+ + \text{B}_2\text{H}_6 \rightarrow ^6\text{NbB}^+ + ^3\text{Nb}_2\text{B}^+ + 3\text{H}_2$            | $\Delta G = 3.87$  |
| $^5\text{Nb}^+ + ^3\text{Nb}_3^+ + \text{B}_2\text{H}_6 \rightarrow ^6\text{NbB}^+ + ^2\text{Nb}_3\text{B}^+ + 3\text{H}_2$            | $\Delta G = 2.27$  |
| $^5\text{Nb}^+ + ^2\text{Nb}_4^+ + \text{B}_2\text{H}_6 \rightarrow ^6\text{NbB}^+ + ^1\text{Nb}_4\text{B}^+ + 3\text{H}_2$            | $\Delta G = 2.08$  |
| $^5\text{Nb}^+ + ^3\text{Nb}_5^+ + \text{B}_2\text{H}_6 \rightarrow ^6\text{NbB}^+ + ^4\text{Nb}_5\text{B}^+ + 3\text{H}_2$            | $\Delta G = 2.03$  |
| $^5\text{Nb}^+ + ^2\text{Nb}_6^+ + \text{B}_2\text{H}_6 \rightarrow ^6\text{NbB}^+ + ^3\text{Nb}_6\text{B}^+ + 3\text{H}_2$            | $\Delta G = 0.76$  |
| $^5\text{Nb}^+ + ^3\text{Nb}_7^+ + \text{B}_2\text{H}_6 \rightarrow ^6\text{NbB}^+ + ^2\text{Nb}_7\text{B}^+ + 3\text{H}_2$            | $\Delta G = 2.41$  |
| $^5\text{Nb}^+ + ^2\text{Nb}_8^+ + \text{B}_2\text{H}_6 \rightarrow ^6\text{NbB}^+ + ^1\text{Nb}_8\text{B}^+ + 3\text{H}_2$            | $\Delta G = 2.13$  |
| $2\ ^2\text{Nb}_2^+ + \text{B}_2\text{H}_6 \rightarrow 2\ ^3\text{Nb}_2\text{B}^+ + 3\text{H}_2$                                       | $\Delta G = 2.96$  |
| $^2\text{Nb}_2^+ + ^3\text{Nb}_3^+ + \text{B}_2\text{H}_6 \rightarrow ^3\text{Nb}_2\text{B}^+ + ^2\text{Nb}_3\text{B}^+ + 3\text{H}_2$ | $\Delta G = 1.35$  |
| $^2\text{Nb}_2^+ + ^2\text{Nb}_4^+ + \text{B}_2\text{H}_6 \rightarrow ^3\text{Nb}_2\text{B}^+ + ^1\text{Nb}_4\text{B}^+ + 3\text{H}_2$ | $\Delta G = 1.17$  |
| $^2\text{Nb}_2^+ + ^3\text{Nb}_5^+ + \text{B}_2\text{H}_6 \rightarrow ^3\text{Nb}_2\text{B}^+ + ^4\text{Nb}_5\text{B}^+ + 3\text{H}_2$ | $\Delta G = 1.12$  |
| $^2\text{Nb}_2^+ + ^2\text{Nb}_6^+ + \text{B}_2\text{H}_6 \rightarrow ^3\text{Nb}_2\text{B}^+ + ^3\text{Nb}_6\text{B}^+ + 3\text{H}_2$ | $\Delta G = -0.15$ |
| $^2\text{Nb}_2^+ + ^3\text{Nb}_7^+ + \text{B}_2\text{H}_6 \rightarrow ^3\text{Nb}_2\text{B}^+ + ^2\text{Nb}_7\text{B}^+ + 3\text{H}_2$ | $\Delta G = 1.49$  |
| $^2\text{Nb}_2^+ + ^2\text{Nb}_8^+ + \text{B}_2\text{H}_6 \rightarrow ^3\text{Nb}_2\text{B}^+ + ^1\text{Nb}_8\text{B}^+ + 3\text{H}_2$ | $\Delta G = 1.21$  |
| $2\ ^3\text{Nb}_3^+ + \text{B}_2\text{H}_6 \rightarrow 2\ ^2\text{Nb}_3\text{B}^+ + 3\text{H}_2$                                       | $\Delta G = -0.25$ |
| $^3\text{Nb}_3^+ + ^2\text{Nb}_4^+ + \text{B}_2\text{H}_6 \rightarrow ^2\text{Nb}_3\text{B}^+ + ^1\text{Nb}_4\text{B}^+ + 3\text{H}_2$ | $\Delta G = -0.44$ |
| $^3\text{Nb}_3^+ + ^3\text{Nb}_5^+ + \text{B}_2\text{H}_6 \rightarrow ^2\text{Nb}_3\text{B}^+ + ^4\text{Nb}_5\text{B}^+ + 3\text{H}_2$ | $\Delta G = -0.49$ |
| $^3\text{Nb}_3^+ + ^2\text{Nb}_6^+ + \text{B}_2\text{H}_6 \rightarrow ^2\text{Nb}_3\text{B}^+ + ^3\text{Nb}_6\text{B}^+ + 3\text{H}_2$ | $\Delta G = -1.76$ |
| $^3\text{Nb}_3^+ + ^3\text{Nb}_7^+ + \text{B}_2\text{H}_6 \rightarrow ^2\text{Nb}_3\text{B}^+ + ^2\text{Nb}_7\text{B}^+ + 3\text{H}_2$ | $\Delta G = -0.11$ |
| $^3\text{Nb}_3^+ + ^2\text{Nb}_8^+ + \text{B}_2\text{H}_6 \rightarrow ^2\text{Nb}_3\text{B}^+ + ^1\text{Nb}_8\text{B}^+ + 3\text{H}_2$ | $\Delta G = -0.39$ |
| $2\ ^2\text{Nb}_4^+ + \text{B}_2\text{H}_6 \rightarrow 2\ ^1\text{Nb}_4\text{B}^+ + 3\text{H}_2$                                       | $\Delta G = -0.62$ |
| $^2\text{Nb}_4^+ + ^3\text{Nb}_5^+ + \text{B}_2\text{H}_6 \rightarrow ^1\text{Nb}_4\text{B}^+ + ^4\text{Nb}_5\text{B}^+ + 3\text{H}_2$ | $\Delta G = -0.67$ |
| $^2\text{Nb}_4^+ + ^2\text{Nb}_6^+ + \text{B}_2\text{H}_6 \rightarrow ^1\text{Nb}_4\text{B}^+ + ^3\text{Nb}_6\text{B}^+ + 3\text{H}_2$ | $\Delta G = -1.94$ |
| $^2\text{Nb}_4^+ + ^3\text{Nb}_7^+ + \text{B}_2\text{H}_6 \rightarrow ^1\text{Nb}_4\text{B}^+ + ^2\text{Nb}_7\text{B}^+ + 3\text{H}_2$ | $\Delta G = -0.30$ |
| $^2\text{Nb}_4^+ + ^2\text{Nb}_8^+ + \text{B}_2\text{H}_6 \rightarrow ^1\text{Nb}_4\text{B}^+ + ^1\text{Nb}_8\text{B}^+ + 3\text{H}_2$ | $\Delta G = -0.57$ |
| $2\ ^3\text{Nb}_5^+ + \text{B}_2\text{H}_6 \rightarrow 2\ ^4\text{Nb}_5\text{B}^+ + 3\text{H}_2$                                       | $\Delta G = -0.72$ |
| $^3\text{Nb}_5^+ + ^2\text{Nb}_6^+ + \text{B}_2\text{H}_6 \rightarrow ^4\text{Nb}_5\text{B}^+ + ^3\text{Nb}_6\text{B}^+ + 3\text{H}_2$ | $\Delta G = -1.99$ |
| $^3\text{Nb}_5^+ + ^3\text{Nb}_7^+ + \text{B}_2\text{H}_6 \rightarrow ^4\text{Nb}_5\text{B}^+ + ^2\text{Nb}_7\text{B}^+ + 3\text{H}_2$ | $\Delta G = -0.35$ |
| $^3\text{Nb}_5^+ + ^2\text{Nb}_8^+ + \text{B}_2\text{H}_6 \rightarrow ^4\text{Nb}_5\text{B}^+ + ^1\text{Nb}_8\text{B}^+ + 3\text{H}_2$ | $\Delta G = -0.62$ |
| $2\ ^2\text{Nb}_6^+ + \text{B}_2\text{H}_6 \rightarrow 2\ ^3\text{Nb}_6\text{B}^+ + 3\text{H}_2$                                       | $\Delta G = -3.26$ |
| $^2\text{Nb}_6^+ + ^3\text{Nb}_7^+ + \text{B}_2\text{H}_6 \rightarrow ^3\text{Nb}_6\text{B}^+ + ^2\text{Nb}_7\text{B}^+ + 3\text{H}_2$ | $\Delta G = -1.62$ |
| $^2\text{Nb}_6^+ + ^2\text{Nb}_8^+ + \text{B}_2\text{H}_6 \rightarrow ^3\text{Nb}_6\text{B}^+ + ^1\text{Nb}_8\text{B}^+ + 3\text{H}_2$ | $\Delta G = -1.90$ |
| $2\ ^3\text{Nb}_7^+ + \text{B}_2\text{H}_6 \rightarrow 2\ ^2\text{Nb}_7\text{B}^+ + 3\text{H}_2$                                       | $\Delta G = 0.03$  |
| $^3\text{Nb}_7^+ + ^2\text{Nb}_8^+ + \text{B}_2\text{H}_6 \rightarrow ^2\text{Nb}_7\text{B}^+ + ^1\text{Nb}_8\text{B}^+ + 3\text{H}_2$ | $\Delta G = -0.25$ |
| $2\ ^2\text{Nb}_8^+ + \text{B}_2\text{H}_6 \rightarrow 2\ ^1\text{Nb}_8\text{B}^+ + 3\text{H}_2$                                       | $\Delta G = -0.53$ |

**Table S9. Thermodynamics energy changes ( $\Delta G$ ) for  $\text{Nb}_n^+ + \text{Nb}_m + \text{B}_2\text{H}_6 \rightarrow \text{Nb}_n\text{B}^+ + \text{Nb}_m\text{B} + 3\text{H}_2$ . The pre-superscripts refer to spin multiplicities. Energies are given in eV.**

| Thermodynamics energy changes (eV)                                                                                                         |                    |
|--------------------------------------------------------------------------------------------------------------------------------------------|--------------------|
| ${}^5\text{Nb}^+ + {}^6\text{Nb} + \text{B}_2\text{H}_6 \rightarrow {}^6\text{NbB}^+ + {}^7\text{NbB} + 3\text{H}_2$                       | $\Delta G = 4.62$  |
| ${}^5\text{Nb}^+ + {}^3\text{Nb}_2 + \text{B}_2\text{H}_6 \rightarrow {}^6\text{NbB}^+ + {}^2\text{Nb}_2\text{B} + 3\text{H}_2$            | $\Delta G = 3.77$  |
| ${}^5\text{Nb}^+ + {}^2\text{Nb}_3 + \text{B}_2\text{H}_6 \rightarrow {}^6\text{NbB}^+ + {}^1\text{Nb}_3\text{B} + 3\text{H}_2$            | $\Delta G = 2.61$  |
| ${}^5\text{Nb}^+ + {}^1\text{Nb}_4 + \text{B}_2\text{H}_6 \rightarrow {}^6\text{NbB}^+ + {}^2\text{Nb}_4\text{B} + 3\text{H}_2$            | $\Delta G = 2.26$  |
| ${}^5\text{Nb}^+ + {}^2\text{Nb}_5 + \text{B}_2\text{H}_6 \rightarrow {}^6\text{NbB}^+ + {}^3\text{Nb}_5\text{B} + 3\text{H}_2$            | $\Delta G = 1.77$  |
| ${}^5\text{Nb}^+ + {}^3\text{Nb}_6 + \text{B}_2\text{H}_6 \rightarrow {}^6\text{NbB}^+ + {}^2\text{Nb}_6\text{B} + 3\text{H}_2$            | $\Delta G = 0.86$  |
| ${}^5\text{Nb}^+ + {}^2\text{Nb}_7 + \text{B}_2\text{H}_6 \rightarrow {}^6\text{NbB}^+ + {}^1\text{Nb}_7\text{B} + 3\text{H}_2$            | $\Delta G = 2.37$  |
| ${}^5\text{Nb}^+ + {}^1\text{Nb}_8 + \text{B}_2\text{H}_6 \rightarrow {}^6\text{NbB}^+ + {}^2\text{Nb}_8\text{B} + 3\text{H}_2$            | $\Delta G = 2.35$  |
| ${}^2\text{Nb}_2^+ + {}^6\text{Nb} + \text{B}_2\text{H}_6 \rightarrow {}^3\text{Nb}_2\text{B}^+ + {}^7\text{NbB} + 3\text{H}_2$            | $\Delta G = 3.70$  |
| ${}^2\text{Nb}_2^+ + {}^3\text{Nb}_2 + \text{B}_2\text{H}_6 \rightarrow {}^3\text{Nb}_2\text{B}^+ + {}^2\text{Nb}_2\text{B} + 3\text{H}_2$ | $\Delta G = 2.86$  |
| ${}^2\text{Nb}_2^+ + {}^2\text{Nb}_3 + \text{B}_2\text{H}_6 \rightarrow {}^3\text{Nb}_2\text{B}^+ + {}^1\text{Nb}_3\text{B} + 3\text{H}_2$ | $\Delta G = 1.69$  |
| ${}^2\text{Nb}_2^+ + {}^1\text{Nb}_4 + \text{B}_2\text{H}_6 \rightarrow {}^3\text{Nb}_2\text{B}^+ + {}^2\text{Nb}_4\text{B} + 3\text{H}_2$ | $\Delta G = 1.34$  |
| ${}^2\text{Nb}_2^+ + {}^2\text{Nb}_5 + \text{B}_2\text{H}_6 \rightarrow {}^3\text{Nb}_2\text{B}^+ + {}^3\text{Nb}_5\text{B} + 3\text{H}_2$ | $\Delta G = 0.86$  |
| ${}^2\text{Nb}_2^+ + {}^3\text{Nb}_6 + \text{B}_2\text{H}_6 \rightarrow {}^3\text{Nb}_2\text{B}^+ + {}^2\text{Nb}_6\text{B} + 3\text{H}_2$ | $\Delta G = -0.05$ |
| ${}^2\text{Nb}_2^+ + {}^2\text{Nb}_7 + \text{B}_2\text{H}_6 \rightarrow {}^3\text{Nb}_2\text{B}^+ + {}^1\text{Nb}_7\text{B} + 3\text{H}_2$ | $\Delta G = 1.45$  |
| ${}^2\text{Nb}_2^+ + {}^1\text{Nb}_8 + \text{B}_2\text{H}_6 \rightarrow {}^3\text{Nb}_2\text{B}^+ + {}^2\text{Nb}_8\text{B} + 3\text{H}_2$ | $\Delta G = 1.44$  |
| ${}^3\text{Nb}_3^+ + {}^6\text{Nb} + \text{B}_2\text{H}_6 \rightarrow {}^2\text{Nb}_3\text{B}^+ + {}^7\text{NbB} + 3\text{H}_2$            | $\Delta G = 2.10$  |
| ${}^3\text{Nb}_3^+ + {}^3\text{Nb}_2 + \text{B}_2\text{H}_6 \rightarrow {}^2\text{Nb}_3\text{B}^+ + {}^2\text{Nb}_2\text{B} + 3\text{H}_2$ | $\Delta G = 1.25$  |
| ${}^3\text{Nb}_3^+ + {}^2\text{Nb}_3 + \text{B}_2\text{H}_6 \rightarrow {}^2\text{Nb}_3\text{B}^+ + {}^1\text{Nb}_3\text{B} + 3\text{H}_2$ | $\Delta G = 0.09$  |
| ${}^3\text{Nb}_3^+ + {}^1\text{Nb}_4 + \text{B}_2\text{H}_6 \rightarrow {}^2\text{Nb}_3\text{B}^+ + {}^2\text{Nb}_4\text{B} + 3\text{H}_2$ | $\Delta G = -0.26$ |
| ${}^3\text{Nb}_3^+ + {}^2\text{Nb}_5 + \text{B}_2\text{H}_6 \rightarrow {}^2\text{Nb}_3\text{B}^+ + {}^3\text{Nb}_5\text{B} + 3\text{H}_2$ | $\Delta G = -0.75$ |
| ${}^3\text{Nb}_3^+ + {}^3\text{Nb}_6 + \text{B}_2\text{H}_6 \rightarrow {}^2\text{Nb}_3\text{B}^+ + {}^2\text{Nb}_6\text{B} + 3\text{H}_2$ | $\Delta G = -1.66$ |
| ${}^3\text{Nb}_3^+ + {}^2\text{Nb}_7 + \text{B}_2\text{H}_6 \rightarrow {}^2\text{Nb}_3\text{B}^+ + {}^1\text{Nb}_7\text{B} + 3\text{H}_2$ | $\Delta G = -0.15$ |
| ${}^3\text{Nb}_3^+ + {}^1\text{Nb}_8 + \text{B}_2\text{H}_6 \rightarrow {}^2\text{Nb}_3\text{B}^+ + {}^2\text{Nb}_8\text{B} + 3\text{H}_2$ | $\Delta G = -0.17$ |
| ${}^2\text{Nb}_4^+ + {}^6\text{Nb} + \text{B}_2\text{H}_6 \rightarrow {}^1\text{Nb}_4\text{B}^+ + {}^7\text{NbB} + 3\text{H}_2$            | $\Delta G = 1.92$  |
| ${}^2\text{Nb}_4^+ + {}^3\text{Nb}_2 + \text{B}_2\text{H}_6 \rightarrow {}^1\text{Nb}_4\text{B}^+ + {}^2\text{Nb}_2\text{B} + 3\text{H}_2$ | $\Delta G = 1.07$  |
| ${}^2\text{Nb}_4^+ + {}^2\text{Nb}_3 + \text{B}_2\text{H}_6 \rightarrow {}^1\text{Nb}_4\text{B}^+ + {}^1\text{Nb}_3\text{B} + 3\text{H}_2$ | $\Delta G = -0.10$ |
| ${}^2\text{Nb}_4^+ + {}^1\text{Nb}_4 + \text{B}_2\text{H}_6 \rightarrow {}^1\text{Nb}_4\text{B}^+ + {}^2\text{Nb}_4\text{B} + 3\text{H}_2$ | $\Delta G = -0.45$ |
| ${}^2\text{Nb}_4^+ + {}^2\text{Nb}_5 + \text{B}_2\text{H}_6 \rightarrow {}^1\text{Nb}_4\text{B}^+ + {}^3\text{Nb}_5\text{B} + 3\text{H}_2$ | $\Delta G = -0.93$ |
| ${}^2\text{Nb}_4^+ + {}^3\text{Nb}_6 + \text{B}_2\text{H}_6 \rightarrow {}^1\text{Nb}_4\text{B}^+ + {}^2\text{Nb}_6\text{B} + 3\text{H}_2$ | $\Delta G = -1.84$ |
| ${}^2\text{Nb}_4^+ + {}^2\text{Nb}_7 + \text{B}_2\text{H}_6 \rightarrow {}^1\text{Nb}_4\text{B}^+ + {}^1\text{Nb}_7\text{B} + 3\text{H}_2$ | $\Delta G = -0.34$ |
| ${}^2\text{Nb}_4^+ + {}^1\text{Nb}_8 + \text{B}_2\text{H}_6 \rightarrow {}^1\text{Nb}_4\text{B}^+ + {}^2\text{Nb}_8\text{B} + 3\text{H}_2$ | $\Delta G = -0.35$ |
| ${}^3\text{Nb}_5^+ + {}^6\text{Nb} + \text{B}_2\text{H}_6 \rightarrow {}^4\text{Nb}_5\text{B}^+ + {}^7\text{NbB} + 3\text{H}_2$            | $\Delta G = 1.87$  |
| ${}^3\text{Nb}_5^+ + {}^3\text{Nb}_2 + \text{B}_2\text{H}_6 \rightarrow {}^4\text{Nb}_5\text{B}^+ + {}^2\text{Nb}_2\text{B} + 3\text{H}_2$ | $\Delta G = 1.02$  |
| ${}^3\text{Nb}_5^+ + {}^2\text{Nb}_3 + \text{B}_2\text{H}_6 \rightarrow {}^4\text{Nb}_5\text{B}^+ + {}^1\text{Nb}_3\text{B} + 3\text{H}_2$ | $\Delta G = -0.15$ |
| ${}^3\text{Nb}_5^+ + {}^1\text{Nb}_4 + \text{B}_2\text{H}_6 \rightarrow {}^4\text{Nb}_5\text{B}^+ + {}^2\text{Nb}_4\text{B} + 3\text{H}_2$ | $\Delta G = -0.50$ |
| ${}^3\text{Nb}_5^+ + {}^2\text{Nb}_5 + \text{B}_2\text{H}_6 \rightarrow {}^4\text{Nb}_5\text{B}^+ + {}^3\text{Nb}_5\text{B} + 3\text{H}_2$ | $\Delta G = -0.98$ |
| ${}^3\text{Nb}_5^+ + {}^3\text{Nb}_6 + \text{B}_2\text{H}_6 \rightarrow {}^4\text{Nb}_5\text{B}^+ + {}^2\text{Nb}_6\text{B} + 3\text{H}_2$ | $\Delta G = -1.89$ |
| ${}^3\text{Nb}_5^+ + {}^2\text{Nb}_7 + \text{B}_2\text{H}_6 \rightarrow {}^4\text{Nb}_5\text{B}^+ + {}^1\text{Nb}_7\text{B} + 3\text{H}_2$ | $\Delta G = -0.39$ |
| ${}^3\text{Nb}_5^+ + {}^1\text{Nb}_8 + \text{B}_2\text{H}_6 \rightarrow {}^4\text{Nb}_5\text{B}^+ + {}^2\text{Nb}_8\text{B} + 3\text{H}_2$ | $\Delta G = -0.40$ |
| ${}^2\text{Nb}_6^+ + {}^6\text{Nb} + \text{B}_2\text{H}_6 \rightarrow {}^3\text{Nb}_6\text{B}^+ + {}^7\text{NbB} + 3\text{H}_2$            | $\Delta G = 0.59$  |

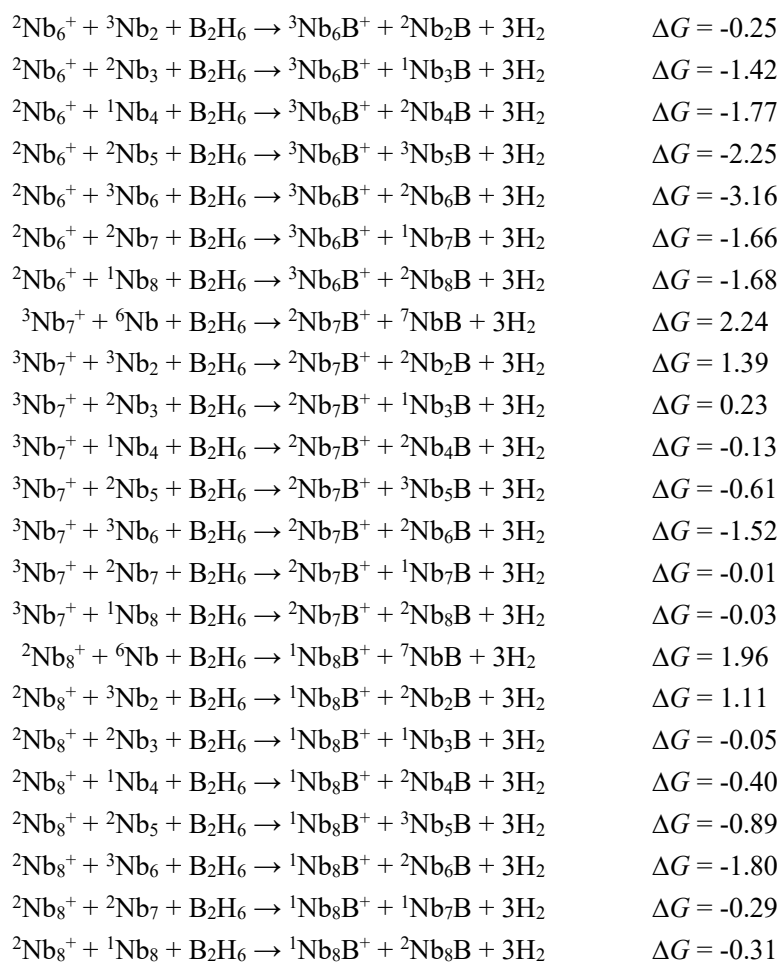



**Table S11. Thermodynamics energy changes ( $\Delta G$ ) for  $\text{Nb}_n^+ + \text{Nb}_m + \text{B}_2\text{H}_6 \rightarrow \text{Nb}_m\text{B}_2^+ + \text{Nb}_n + 3 \text{H}_2$ . The pre-superscripts refer to spin multiplicities. Energies are given in eV.**

| Thermodynamics energy changes (eV)                                                                                            |                    |
|-------------------------------------------------------------------------------------------------------------------------------|--------------------|
| $^5\text{Nb}^+ + ^3\text{Nb}_2 + \text{B}_2\text{H}_6 \rightarrow ^2\text{Nb}_2\text{B}_2^+ + ^6\text{Nb} + 3 \text{H}_2$     | $\Delta G = 1.20$  |
| $^5\text{Nb}^+ + ^2\text{Nb}_3 + \text{B}_2\text{H}_6 \rightarrow ^3\text{Nb}_3\text{B}_2^+ + ^6\text{Nb} + 3 \text{H}_2$     | $\Delta G = -1.00$ |
| $^5\text{Nb}^+ + ^1\text{Nb}_4 + \text{B}_2\text{H}_6 \rightarrow ^2\text{Nb}_4\text{B}_2^+ + ^6\text{Nb} + 3 \text{H}_2$     | $\Delta G = -1.71$ |
| $^5\text{Nb}^+ + ^2\text{Nb}_5 + \text{B}_2\text{H}_6 \rightarrow ^1\text{Nb}_5\text{B}_2^+ + ^6\text{Nb} + 3 \text{H}_2$     | $\Delta G = -2.86$ |
| $^5\text{Nb}^+ + ^3\text{Nb}_6 + \text{B}_2\text{H}_6 \rightarrow ^2\text{Nb}_6\text{B}_2^+ + ^6\text{Nb} + 3 \text{H}_2$     | $\Delta G = -2.91$ |
| $^5\text{Nb}^+ + ^2\text{Nb}_7 + \text{B}_2\text{H}_6 \rightarrow ^1\text{Nb}_7\text{B}_2^+ + ^6\text{Nb} + 3 \text{H}_2$     | $\Delta G = -2.13$ |
| $^5\text{Nb}^+ + ^1\text{Nb}_8 + \text{B}_2\text{H}_6 \rightarrow ^2\text{Nb}_8\text{B}_2^+ + ^6\text{Nb} + 3 \text{H}_2$     | $\Delta G = -2.03$ |
| $^2\text{Nb}_2^+ + ^6\text{Nb} + \text{B}_2\text{H}_6 \rightarrow ^1\text{NbB}_2^+ + ^3\text{Nb}_2 + 3 \text{H}_2$            | $\Delta G = 3.39$  |
| $^2\text{Nb}_2^+ + ^2\text{Nb}_3 + \text{B}_2\text{H}_6 \rightarrow ^3\text{Nb}_3\text{B}_2^+ + ^3\text{Nb}_2 + 3 \text{H}_2$ | $\Delta G = -0.56$ |
| $^2\text{Nb}_2^+ + ^1\text{Nb}_4 + \text{B}_2\text{H}_6 \rightarrow ^2\text{Nb}_4\text{B}_2^+ + ^3\text{Nb}_2 + 3 \text{H}_2$ | $\Delta G = -1.27$ |
| $^2\text{Nb}_2^+ + ^2\text{Nb}_5 + \text{B}_2\text{H}_6 \rightarrow ^1\text{Nb}_5\text{B}_2^+ + ^3\text{Nb}_2 + 3 \text{H}_2$ | $\Delta G = -2.41$ |
| $^2\text{Nb}_2^+ + ^3\text{Nb}_6 + \text{B}_2\text{H}_6 \rightarrow ^2\text{Nb}_6\text{B}_2^+ + ^3\text{Nb}_2 + 3 \text{H}_2$ | $\Delta G = -2.47$ |
| $^2\text{Nb}_2^+ + ^2\text{Nb}_7 + \text{B}_2\text{H}_6 \rightarrow ^1\text{Nb}_7\text{B}_2^+ + ^3\text{Nb}_2 + 3 \text{H}_2$ | $\Delta G = -1.69$ |
| $^2\text{Nb}_2^+ + ^1\text{Nb}_8 + \text{B}_2\text{H}_6 \rightarrow ^2\text{Nb}_8\text{B}_2^+ + ^3\text{Nb}_2 + 3 \text{H}_2$ | $\Delta G = -1.59$ |
| $^3\text{Nb}_3^+ + ^6\text{Nb} + \text{B}_2\text{H}_6 \rightarrow ^1\text{NbB}_2^+ + ^2\text{Nb}_3 + 3 \text{H}_2$            | $\Delta G = 3.75$  |
| $^3\text{Nb}_3^+ + ^3\text{Nb}_2 + \text{B}_2\text{H}_6 \rightarrow ^2\text{Nb}_2\text{B}_2^+ + ^2\text{Nb}_3 + 3 \text{H}_2$ | $\Delta G = 2.00$  |
| $^3\text{Nb}_3^+ + ^1\text{Nb}_4 + \text{B}_2\text{H}_6 \rightarrow ^2\text{Nb}_4\text{B}_2^+ + ^2\text{Nb}_3 + 3 \text{H}_2$ | $\Delta G = -0.91$ |
| $^3\text{Nb}_3^+ + ^2\text{Nb}_5 + \text{B}_2\text{H}_6 \rightarrow ^1\text{Nb}_5\text{B}_2^+ + ^2\text{Nb}_3 + 3 \text{H}_2$ | $\Delta G = -2.06$ |
| $^3\text{Nb}_3^+ + ^3\text{Nb}_6 + \text{B}_2\text{H}_6 \rightarrow ^2\text{Nb}_6\text{B}_2^+ + ^2\text{Nb}_3 + 3 \text{H}_2$ | $\Delta G = -2.11$ |
| $^3\text{Nb}_3^+ + ^2\text{Nb}_7 + \text{B}_2\text{H}_6 \rightarrow ^1\text{Nb}_7\text{B}_2^+ + ^2\text{Nb}_3 + 3 \text{H}_2$ | $\Delta G = -1.33$ |
| $^3\text{Nb}_3^+ + ^1\text{Nb}_8 + \text{B}_2\text{H}_6 \rightarrow ^2\text{Nb}_8\text{B}_2^+ + ^2\text{Nb}_3 + 3 \text{H}_2$ | $\Delta G = -1.23$ |
| $^2\text{Nb}_4^+ + ^6\text{Nb} + \text{B}_2\text{H}_6 \rightarrow ^1\text{NbB}_2^+ + ^1\text{Nb}_4 + 3 \text{H}_2$            | $\Delta G = 4.05$  |
| $^2\text{Nb}_4^+ + ^3\text{Nb}_2 + \text{B}_2\text{H}_6 \rightarrow ^2\text{Nb}_2\text{B}_2^+ + ^1\text{Nb}_4 + 3 \text{H}_2$ | $\Delta G = 2.31$  |
| $^2\text{Nb}_4^+ + ^2\text{Nb}_3 + \text{B}_2\text{H}_6 \rightarrow ^3\text{Nb}_3\text{B}_2^+ + ^1\text{Nb}_4 + 3 \text{H}_2$ | $\Delta G = 0.11$  |
| $^2\text{Nb}_4^+ + ^2\text{Nb}_5 + \text{B}_2\text{H}_6 \rightarrow ^1\text{Nb}_5\text{B}_2^+ + ^1\text{Nb}_4 + 3 \text{H}_2$ | $\Delta G = -1.75$ |
| $^2\text{Nb}_4^+ + ^3\text{Nb}_6 + \text{B}_2\text{H}_6 \rightarrow ^2\text{Nb}_6\text{B}_2^+ + ^1\text{Nb}_4 + 3 \text{H}_2$ | $\Delta G = -1.80$ |
| $^2\text{Nb}_4^+ + ^2\text{Nb}_7 + \text{B}_2\text{H}_6 \rightarrow ^1\text{Nb}_7\text{B}_2^+ + ^1\text{Nb}_4 + 3 \text{H}_2$ | $\Delta G = -1.02$ |
| $^2\text{Nb}_4^+ + ^1\text{Nb}_8 + \text{B}_2\text{H}_6 \rightarrow ^2\text{Nb}_8\text{B}_2^+ + ^1\text{Nb}_4 + 3 \text{H}_2$ | $\Delta G = -0.92$ |
| $^3\text{Nb}_5^+ + ^6\text{Nb} + \text{B}_2\text{H}_6 \rightarrow ^1\text{NbB}_2^+ + ^2\text{Nb}_5 + 3 \text{H}_2$            | $\Delta G = 4.34$  |
| $^3\text{Nb}_5^+ + ^3\text{Nb}_2 + \text{B}_2\text{H}_6 \rightarrow ^2\text{Nb}_2\text{B}_2^+ + ^2\text{Nb}_5 + 3 \text{H}_2$ | $\Delta G = 2.59$  |
| $^3\text{Nb}_5^+ + ^2\text{Nb}_3 + \text{B}_2\text{H}_6 \rightarrow ^3\text{Nb}_3\text{B}_2^+ + ^2\text{Nb}_5 + 3 \text{H}_2$ | $\Delta G = 0.39$  |
| $^3\text{Nb}_5^+ + ^1\text{Nb}_4 + \text{B}_2\text{H}_6 \rightarrow ^2\text{Nb}_4\text{B}_2^+ + ^2\text{Nb}_5 + 3 \text{H}_2$ | $\Delta G = -0.32$ |
| $^3\text{Nb}_5^+ + ^3\text{Nb}_6 + \text{B}_2\text{H}_6 \rightarrow ^2\text{Nb}_6\text{B}_2^+ + ^2\text{Nb}_5 + 3 \text{H}_2$ | $\Delta G = -1.52$ |
| $^3\text{Nb}_5^+ + ^2\text{Nb}_7 + \text{B}_2\text{H}_6 \rightarrow ^1\text{Nb}_7\text{B}_2^+ + ^2\text{Nb}_5 + 3 \text{H}_2$ | $\Delta G = -0.74$ |
| $^3\text{Nb}_5^+ + ^1\text{Nb}_8 + \text{B}_2\text{H}_6 \rightarrow ^2\text{Nb}_8\text{B}_2^+ + ^2\text{Nb}_5 + 3 \text{H}_2$ | $\Delta G = -0.64$ |
| $^2\text{Nb}_6^+ + ^6\text{Nb} + \text{B}_2\text{H}_6 \rightarrow ^1\text{NbB}_2^+ + ^3\text{Nb}_6 + 3 \text{H}_2$            | $\Delta G = 4.34$  |
| $^2\text{Nb}_6^+ + ^3\text{Nb}_2 + \text{B}_2\text{H}_6 \rightarrow ^2\text{Nb}_2\text{B}_2^+ + ^3\text{Nb}_6 + 3 \text{H}_2$ | $\Delta G = 2.60$  |
| $^2\text{Nb}_6^+ + ^2\text{Nb}_3 + \text{B}_2\text{H}_6 \rightarrow ^3\text{Nb}_3\text{B}_2^+ + ^3\text{Nb}_6 + 3 \text{H}_2$ | $\Delta G = 0.39$  |
| $^2\text{Nb}_6^+ + ^1\text{Nb}_4 + \text{B}_2\text{H}_6 \rightarrow ^2\text{Nb}_4\text{B}_2^+ + ^3\text{Nb}_6 + 3 \text{H}_2$ | $\Delta G = -0.32$ |
| $^2\text{Nb}_6^+ + ^2\text{Nb}_5 + \text{B}_2\text{H}_6 \rightarrow ^1\text{Nb}_5\text{B}_2^+ + ^3\text{Nb}_6 + 3 \text{H}_2$ | $\Delta G = -1.46$ |
| $^2\text{Nb}_6^+ + ^2\text{Nb}_7 + \text{B}_2\text{H}_6 \rightarrow ^1\text{Nb}_7\text{B}_2^+ + ^3\text{Nb}_6 + 3 \text{H}_2$ | $\Delta G = -0.74$ |

|                                                                                                                                       |                    |
|---------------------------------------------------------------------------------------------------------------------------------------|--------------------|
| ${}^2\text{Nb}_6^+ + {}^1\text{Nb}_8 + \text{B}_2\text{H}_6 \rightarrow {}^2\text{Nb}_8\text{B}_2^+ + {}^3\text{Nb}_6 + 3 \text{H}_2$ | $\Delta G = -0.64$ |
| ${}^3\text{Nb}_7^+ + {}^6\text{Nb} + \text{B}_2\text{H}_6 \rightarrow {}^1\text{NbB}_2^+ + {}^2\text{Nb}_7 + 3 \text{H}_2$            | $\Delta G = 4.46$  |
| ${}^3\text{Nb}_7^+ + {}^3\text{Nb}_2 + \text{B}_2\text{H}_6 \rightarrow {}^2\text{Nb}_2\text{B}_2^+ + {}^2\text{Nb}_7 + 3 \text{H}_2$ | $\Delta G = 2.72$  |
| ${}^3\text{Nb}_7^+ + {}^2\text{Nb}_3 + \text{B}_2\text{H}_6 \rightarrow {}^3\text{Nb}_3\text{B}_2^+ + {}^2\text{Nb}_7 + 3 \text{H}_2$ | $\Delta G = 0.52$  |
| ${}^3\text{Nb}_7^+ + {}^1\text{Nb}_4 + \text{B}_2\text{H}_6 \rightarrow {}^2\text{Nb}_4\text{B}_2^+ + {}^2\text{Nb}_7 + 3 \text{H}_2$ | $\Delta G = -0.19$ |
| ${}^3\text{Nb}_7^+ + {}^2\text{Nb}_5 + \text{B}_2\text{H}_6 \rightarrow {}^1\text{Nb}_5\text{B}_2^+ + {}^2\text{Nb}_7 + 3 \text{H}_2$ | $\Delta G = -1.34$ |
| ${}^3\text{Nb}_7^+ + {}^3\text{Nb}_6 + \text{B}_2\text{H}_6 \rightarrow {}^2\text{Nb}_6\text{B}_2^+ + {}^2\text{Nb}_7 + 3 \text{H}_2$ | $\Delta G = -1.39$ |
| ${}^3\text{Nb}_7^+ + {}^1\text{Nb}_8 + \text{B}_2\text{H}_6 \rightarrow {}^2\text{Nb}_8\text{B}_2^+ + {}^2\text{Nb}_7 + 3 \text{H}_2$ | $\Delta G = -0.51$ |
| ${}^2\text{Nb}_8^+ + {}^6\text{Nb} + \text{B}_2\text{H}_6 \rightarrow {}^1\text{NbB}_2^+ + {}^1\text{Nb}_8 + 3 \text{H}_2$            | $\Delta G = 4.26$  |
| ${}^2\text{Nb}_8^+ + {}^3\text{Nb}_2 + \text{B}_2\text{H}_6 \rightarrow {}^2\text{Nb}_2\text{B}_2^+ + {}^1\text{Nb}_8 + 3 \text{H}_2$ | $\Delta G = 2.52$  |
| ${}^2\text{Nb}_8^+ + {}^2\text{Nb}_3 + \text{B}_2\text{H}_6 \rightarrow {}^3\text{Nb}_3\text{B}_2^+ + {}^1\text{Nb}_8 + 3 \text{H}_2$ | $\Delta G = 0.31$  |
| ${}^2\text{Nb}_8^+ + {}^1\text{Nb}_4 + \text{B}_2\text{H}_6 \rightarrow {}^2\text{Nb}_4\text{B}_2^+ + {}^1\text{Nb}_8 + 3 \text{H}_2$ | $\Delta G = -0.39$ |
| ${}^2\text{Nb}_8^+ + {}^2\text{Nb}_5 + \text{B}_2\text{H}_6 \rightarrow {}^1\text{Nb}_5\text{B}_2^+ + {}^1\text{Nb}_8 + 3 \text{H}_2$ | $\Delta G = -1.54$ |
| ${}^2\text{Nb}_8^+ + {}^3\text{Nb}_6 + \text{B}_2\text{H}_6 \rightarrow {}^2\text{Nb}_6\text{B}_2^+ + {}^1\text{Nb}_8 + 3 \text{H}_2$ | $\Delta G = -1.59$ |
| ${}^2\text{Nb}_8^+ + {}^2\text{Nb}_7 + \text{B}_2\text{H}_6 \rightarrow {}^1\text{Nb}_7\text{B}_2^+ + {}^1\text{Nb}_8 + 3 \text{H}_2$ | $\Delta G = -0.81$ |

**Table S12. Thermodynamics energy changes ( $\Delta G$ ) for  $\text{Nb}_n^+ + \text{Nb}_m + \text{B}_2\text{H}_6 \rightarrow \text{Nb}_m\text{B}_2^+ + \text{Nb}_n + 3 \text{H}_2$ . The pre-superscripts refer to spin multiplicities. Energies are given in eV.**

| Thermodynamics energy changes (eV)                                                                                                          |                    |
|---------------------------------------------------------------------------------------------------------------------------------------------|--------------------|
| ${}^5\text{Nb}^+ + {}^3\text{Nb}_2 + \text{B}_2\text{H}_6 \rightarrow {}^3\text{Nb}_2\text{B}^+ + {}^7\text{NbB} + 3 \text{H}_2$            | $\Delta G = 3.26$  |
| ${}^5\text{Nb}^+ + {}^2\text{Nb}_3 + \text{B}_2\text{H}_6 \rightarrow {}^2\text{Nb}_3\text{B}^+ + {}^7\text{NbB} + 3 \text{H}_2$            | $\Delta G = 1.30$  |
| ${}^5\text{Nb}^+ + {}^1\text{Nb}_4 + \text{B}_2\text{H}_6 \rightarrow {}^1\text{Nb}_4\text{B}^+ + {}^7\text{NbB} + 3 \text{H}_2$            | $\Delta G = 0.81$  |
| ${}^5\text{Nb}^+ + {}^2\text{Nb}_5 + \text{B}_2\text{H}_6 \rightarrow {}^4\text{Nb}_5\text{B}^+ + {}^7\text{NbB} + 3 \text{H}_2$            | $\Delta G = 0.48$  |
| ${}^5\text{Nb}^+ + {}^3\text{Nb}_6 + \text{B}_2\text{H}_6 \rightarrow {}^3\text{Nb}_6\text{B}^+ + {}^7\text{NbB} + 3 \text{H}_2$            | $\Delta G = -0.80$ |
| ${}^5\text{Nb}^+ + {}^2\text{Nb}_7 + \text{B}_2\text{H}_6 \rightarrow {}^2\text{Nb}_7\text{B}^+ + {}^7\text{NbB} + 3 \text{H}_2$            | $\Delta G = 0.72$  |
| ${}^5\text{Nb}^+ + {}^1\text{Nb}_8 + \text{B}_2\text{H}_6 \rightarrow {}^1\text{Nb}_8\text{B}^+ + {}^7\text{NbB} + 3 \text{H}_2$            | $\Delta G = 0.65$  |
| ${}^2\text{Nb}_2^+ + {}^6\text{Nb} + \text{B}_2\text{H}_6 \rightarrow {}^6\text{NbB}^+ + {}^2\text{Nb}_2\text{B} + 3 \text{H}_2$            | $\Delta G = 4.21$  |
| ${}^2\text{Nb}_2^+ + {}^2\text{Nb}_3 + \text{B}_2\text{H}_6 \rightarrow {}^2\text{Nb}_3\text{B}^+ + {}^2\text{Nb}_2\text{B} + 3 \text{H}_2$ | $\Delta G = 0.90$  |
| ${}^2\text{Nb}_2^+ + {}^1\text{Nb}_4 + \text{B}_2\text{H}_6 \rightarrow {}^1\text{Nb}_4\text{B}^+ + {}^2\text{Nb}_2\text{B} + 3 \text{H}_2$ | $\Delta G = 0.40$  |
| ${}^2\text{Nb}_2^+ + {}^2\text{Nb}_5 + \text{B}_2\text{H}_6 \rightarrow {}^4\text{Nb}_5\text{B}^+ + {}^2\text{Nb}_2\text{B} + 3 \text{H}_2$ | $\Delta G = 0.07$  |
| ${}^2\text{Nb}_2^+ + {}^3\text{Nb}_6 + \text{B}_2\text{H}_6 \rightarrow {}^3\text{Nb}_6\text{B}^+ + {}^2\text{Nb}_2\text{B} + 3 \text{H}_2$ | $\Delta G = -1.20$ |
| ${}^2\text{Nb}_2^+ + {}^2\text{Nb}_7 + \text{B}_2\text{H}_6 \rightarrow {}^2\text{Nb}_7\text{B}^+ + {}^2\text{Nb}_2\text{B} + 3 \text{H}_2$ | $\Delta G = 0.31$  |
| ${}^2\text{Nb}_2^+ + {}^1\text{Nb}_8 + \text{B}_2\text{H}_6 \rightarrow {}^1\text{Nb}_8\text{B}^+ + {}^2\text{Nb}_2\text{B} + 3 \text{H}_2$ | $\Delta G = 0.24$  |
| ${}^3\text{Nb}_3^+ + {}^6\text{Nb} + \text{B}_2\text{H}_6 \rightarrow {}^6\text{NbB}^+ + {}^1\text{Nb}_3\text{B} + 3 \text{H}_2$            | $\Delta G = 3.41$  |
| ${}^3\text{Nb}_3^+ + {}^3\text{Nb}_2 + \text{B}_2\text{H}_6 \rightarrow {}^3\text{Nb}_2\text{B}^+ + {}^1\text{Nb}_3\text{B} + 3 \text{H}_2$ | $\Delta G = 2.05$  |
| ${}^3\text{Nb}_3^+ + {}^1\text{Nb}_4 + \text{B}_2\text{H}_6 \rightarrow {}^1\text{Nb}_4\text{B}^+ + {}^1\text{Nb}_3\text{B} + 3 \text{H}_2$ | $\Delta G = -0.41$ |
| ${}^3\text{Nb}_3^+ + {}^2\text{Nb}_5 + \text{B}_2\text{H}_6 \rightarrow {}^4\text{Nb}_5\text{B}^+ + {}^1\text{Nb}_3\text{B} + 3 \text{H}_2$ | $\Delta G = -0.74$ |
| ${}^3\text{Nb}_3^+ + {}^3\text{Nb}_6 + \text{B}_2\text{H}_6 \rightarrow {}^3\text{Nb}_6\text{B}^+ + {}^1\text{Nb}_3\text{B} + 3 \text{H}_2$ | $\Delta G = -2.01$ |
| ${}^3\text{Nb}_3^+ + {}^2\text{Nb}_7 + \text{B}_2\text{H}_6 \rightarrow {}^2\text{Nb}_7\text{B}^+ + {}^1\text{Nb}_3\text{B} + 3 \text{H}_2$ | $\Delta G = -0.49$ |
| ${}^3\text{Nb}_3^+ + {}^1\text{Nb}_8 + \text{B}_2\text{H}_6 \rightarrow {}^1\text{Nb}_8\text{B}^+ + {}^1\text{Nb}_3\text{B} + 3 \text{H}_2$ | $\Delta G = -0.57$ |
| ${}^2\text{Nb}_4^+ + {}^6\text{Nb} + \text{B}_2\text{H}_6 \rightarrow {}^6\text{NbB}^+ + {}^2\text{Nb}_4\text{B} + 3 \text{H}_2$            | $\Delta G = 3.36$  |
| ${}^2\text{Nb}_4^+ + {}^3\text{Nb}_2 + \text{B}_2\text{H}_6 \rightarrow {}^3\text{Nb}_2\text{B}^+ + {}^2\text{Nb}_4\text{B} + 3 \text{H}_2$ | $\Delta G = 2.01$  |
| ${}^2\text{Nb}_4^+ + {}^2\text{Nb}_3 + \text{B}_2\text{H}_6 \rightarrow {}^2\text{Nb}_3\text{B}^+ + {}^2\text{Nb}_4\text{B} + 3 \text{H}_2$ | $\Delta G = 0.05$  |
| ${}^2\text{Nb}_4^+ + {}^2\text{Nb}_5 + \text{B}_2\text{H}_6 \rightarrow {}^4\text{Nb}_5\text{B}^+ + {}^2\text{Nb}_4\text{B} + 3 \text{H}_2$ | $\Delta G = -0.78$ |

|                                                                                                                                             |                    |
|---------------------------------------------------------------------------------------------------------------------------------------------|--------------------|
| ${}^2\text{Nb}_4^+ + {}^3\text{Nb}_6 + \text{B}_2\text{H}_6 \rightarrow {}^3\text{Nb}_6\text{B}^+ + {}^2\text{Nb}_4\text{B} + 3 \text{H}_2$ | $\Delta G = -2.05$ |
| ${}^2\text{Nb}_4^+ + {}^2\text{Nb}_7 + \text{B}_2\text{H}_6 \rightarrow {}^2\text{Nb}_7\text{B}^+ + {}^2\text{Nb}_4\text{B} + 3 \text{H}_2$ | $\Delta G = -0.54$ |
| ${}^2\text{Nb}_4^+ + {}^1\text{Nb}_8 + \text{B}_2\text{H}_6 \rightarrow {}^1\text{Nb}_8\text{B}^+ + {}^2\text{Nb}_4\text{B} + 3 \text{H}_2$ | $\Delta G = -0.61$ |
| ${}^3\text{Nb}_5^+ + {}^6\text{Nb} + \text{B}_2\text{H}_6 \rightarrow {}^6\text{NbB}^+ + {}^3\text{Nb}_5\text{B} + 3 \text{H}_2$            | $\Delta G = 3.16$  |
| ${}^3\text{Nb}_5^+ + {}^3\text{Nb}_2 + \text{B}_2\text{H}_6 \rightarrow {}^3\text{Nb}_2\text{B}^+ + {}^3\text{Nb}_5\text{B} + 3 \text{H}_2$ | $\Delta G = 1.80$  |
| ${}^3\text{Nb}_5^+ + {}^2\text{Nb}_3 + \text{B}_2\text{H}_6 \rightarrow {}^2\text{Nb}_3\text{B}^+ + {}^3\text{Nb}_5\text{B} + 3 \text{H}_2$ | $\Delta G = -0.16$ |
| ${}^3\text{Nb}_5^+ + {}^1\text{Nb}_4 + \text{B}_2\text{H}_6 \rightarrow {}^1\text{Nb}_4\text{B}^+ + {}^3\text{Nb}_5\text{B} + 3 \text{H}_2$ | $\Delta G = -0.65$ |
| ${}^3\text{Nb}_5^+ + {}^3\text{Nb}_6 + \text{B}_2\text{H}_6 \rightarrow {}^3\text{Nb}_6\text{B}^+ + {}^3\text{Nb}_5\text{B} + 3 \text{H}_2$ | $\Delta G = -2.26$ |
| ${}^3\text{Nb}_5^+ + {}^2\text{Nb}_7 + \text{B}_2\text{H}_6 \rightarrow {}^2\text{Nb}_7\text{B}^+ + {}^3\text{Nb}_5\text{B} + 3 \text{H}_2$ | $\Delta G = -0.74$ |
| ${}^3\text{Nb}_5^+ + {}^1\text{Nb}_8 + \text{B}_2\text{H}_6 \rightarrow {}^1\text{Nb}_8\text{B}^+ + {}^3\text{Nb}_5\text{B} + 3 \text{H}_2$ | $\Delta G = -0.81$ |
| ${}^2\text{Nb}_6^+ + {}^6\text{Nb} + \text{B}_2\text{H}_6 \rightarrow {}^6\text{NbB}^+ + {}^2\text{Nb}_6\text{B} + 3 \text{H}_2$            | $\Delta G = 2.26$  |
| ${}^2\text{Nb}_6^+ + {}^3\text{Nb}_2 + \text{B}_2\text{H}_6 \rightarrow {}^3\text{Nb}_2\text{B}^+ + {}^2\text{Nb}_6\text{B} + 3 \text{H}_2$ | $\Delta G = 0.90$  |
| ${}^2\text{Nb}_6^+ + {}^2\text{Nb}_3 + \text{B}_2\text{H}_6 \rightarrow {}^2\text{Nb}_3\text{B}^+ + {}^2\text{Nb}_6\text{B} + 3 \text{H}_2$ | $\Delta G = -1.06$ |
| ${}^2\text{Nb}_6^+ + {}^1\text{Nb}_4 + \text{B}_2\text{H}_6 \rightarrow {}^1\text{Nb}_4\text{B}^+ + {}^2\text{Nb}_6\text{B} + 3 \text{H}_2$ | $\Delta G = -1.56$ |
| ${}^2\text{Nb}_6^+ + {}^2\text{Nb}_5 + \text{B}_2\text{H}_6 \rightarrow {}^4\text{Nb}_5\text{B}^+ + {}^2\text{Nb}_6\text{B} + 3 \text{H}_2$ | $\Delta G = -1.89$ |
| ${}^2\text{Nb}_6^+ + {}^2\text{Nb}_7 + \text{B}_2\text{H}_6 \rightarrow {}^2\text{Nb}_7\text{B}^+ + {}^2\text{Nb}_6\text{B} + 3 \text{H}_2$ | $\Delta G = -1.64$ |
| ${}^2\text{Nb}_6^+ + {}^1\text{Nb}_8 + \text{B}_2\text{H}_6 \rightarrow {}^1\text{Nb}_8\text{B}^+ + {}^2\text{Nb}_6\text{B} + 3 \text{H}_2$ | $\Delta G = -1.72$ |
| ${}^3\text{Nb}_7^+ + {}^6\text{Nb} + \text{B}_2\text{H}_6 \rightarrow {}^6\text{NbB}^+ + {}^1\text{Nb}_7\text{B} + 3 \text{H}_2$            | $\Delta G = 3.89$  |
| ${}^3\text{Nb}_7^+ + {}^3\text{Nb}_2 + \text{B}_2\text{H}_6 \rightarrow {}^3\text{Nb}_2\text{B}^+ + {}^1\text{Nb}_7\text{B} + 3 \text{H}_2$ | $\Delta G = 2.53$  |
| ${}^3\text{Nb}_7^+ + {}^2\text{Nb}_3 + \text{B}_2\text{H}_6 \rightarrow {}^2\text{Nb}_3\text{B}^+ + {}^1\text{Nb}_7\text{B} + 3 \text{H}_2$ | $\Delta G = 0.57$  |
| ${}^3\text{Nb}_7^+ + {}^1\text{Nb}_4 + \text{B}_2\text{H}_6 \rightarrow {}^1\text{Nb}_4\text{B}^+ + {}^1\text{Nb}_7\text{B} + 3 \text{H}_2$ | $\Delta G = 0.07$  |
| ${}^3\text{Nb}_7^+ + {}^2\text{Nb}_5 + \text{B}_2\text{H}_6 \rightarrow {}^4\text{Nb}_5\text{B}^+ + {}^1\text{Nb}_7\text{B} + 3 \text{H}_2$ | $\Delta G = -0.26$ |
| ${}^3\text{Nb}_7^+ + {}^3\text{Nb}_6 + \text{B}_2\text{H}_6 \rightarrow {}^3\text{Nb}_6\text{B}^+ + {}^1\text{Nb}_7\text{B} + 3 \text{H}_2$ | $\Delta G = -1.53$ |
| ${}^3\text{Nb}_7^+ + {}^1\text{Nb}_8 + \text{B}_2\text{H}_6 \rightarrow {}^1\text{Nb}_8\text{B}^+ + {}^1\text{Nb}_7\text{B} + 3 \text{H}_2$ | $\Delta G = -0.09$ |
| ${}^2\text{Nb}_8^+ + {}^6\text{Nb} + \text{B}_2\text{H}_6 \rightarrow {}^6\text{NbB}^+ + {}^2\text{Nb}_8\text{B} + 3 \text{H}_2$            | $\Delta G = 3.67$  |
| ${}^2\text{Nb}_8^+ + {}^3\text{Nb}_2 + \text{B}_2\text{H}_6 \rightarrow {}^3\text{Nb}_2\text{B}^+ + {}^2\text{Nb}_8\text{B} + 3 \text{H}_2$ | $\Delta G = 2.31$  |
| ${}^2\text{Nb}_8^+ + {}^2\text{Nb}_3 + \text{B}_2\text{H}_6 \rightarrow {}^2\text{Nb}_3\text{B}^+ + {}^2\text{Nb}_8\text{B} + 3 \text{H}_2$ | $\Delta G = 0.35$  |
| ${}^2\text{Nb}_8^+ + {}^1\text{Nb}_4 + \text{B}_2\text{H}_6 \rightarrow {}^1\text{Nb}_4\text{B}^+ + {}^2\text{Nb}_8\text{B} + 3 \text{H}_2$ | $\Delta G = -0.15$ |
| ${}^2\text{Nb}_8^+ + {}^2\text{Nb}_5 + \text{B}_2\text{H}_6 \rightarrow {}^4\text{Nb}_5\text{B}^+ + {}^2\text{Nb}_8\text{B} + 3 \text{H}_2$ | $\Delta G = -0.48$ |
| ${}^2\text{Nb}_8^+ + {}^3\text{Nb}_6 + \text{B}_2\text{H}_6 \rightarrow {}^3\text{Nb}_6\text{B}^+ + {}^2\text{Nb}_8\text{B} + 3 \text{H}_2$ | $\Delta G = -1.75$ |
| ${}^2\text{Nb}_8^+ + {}^2\text{Nb}_7 + \text{B}_2\text{H}_6 \rightarrow {}^2\text{Nb}_7\text{B}^+ + {}^2\text{Nb}_8\text{B} + 3 \text{H}_2$ | $\Delta G = -0.23$ |

---

## REFERENCES

- (1) Knickelbein, M. B.; Yang, S. Photoionization Studies of Niobium Clusters: Ionization Potentials for Nb<sub>2</sub>–Nb<sub>76</sub>. *J. Chem. Phys.* **1990**, *93*, 5760-5767.
